# Supplementary material
Source: PubMed Central journal article supplement (PMC6379906)

## Supporting Information

### Synthesis of Optically-pure $\gamma$ PNA Monomers: A Comparative Study

Arunava Manna, Srinivas Rapireddy, Gopalsamy Sureshkumar and Danith H. Ly\*

*Department of Chemistry and Center for Nucleic Acids Science and Technology (CNAST),  
Carnegie Mellon University, 4400 Fifth Avenue, Pittsburgh, PA 15213*

[dly@andrew.cmu.edu](mailto:dly@andrew.cmu.edu)

| <b>Contents</b>                                                                      | <b>Pages</b> |
|--------------------------------------------------------------------------------------|--------------|
| <b>Figure 1S.</b> $^{19}\text{F}$ NMR Spectrum of MTPA derivatized D- and L-alaninol | 2            |
| Figure 2S. $^1\text{H}$ NMR Spectrum of compound <b>2a</b>                           | 3            |
| Figure 3S. $^{13}\text{C}$ NMR of <b>2a</b>                                          | 3            |
| Figure 4S. $^1\text{H}$ NMR of <b>3a</b>                                             | 4            |
| Figure 5S. $^{13}\text{C}$ NMR of <b>3a</b>                                          | 4            |
| Figure 6S. $^1\text{H}$ NMR of <b>4a-i</b>                                           | 5            |
| Figure 7S. $^{13}\text{C}$ NMR of <b>4a-i</b>                                        | 5            |
| Figure 8S. $^1\text{H}$ NMR of <b>5a-i</b>                                           | 6            |
| Figure 9S. $^{13}\text{C}$ NMR of <b>5a-i</b>                                        | 6            |
| Figure 10S. $^1\text{H}$ NMR of <b>2b</b>                                            | 7            |
| Figure 11S. $^{13}\text{C}$ NMR of <b>2b</b>                                         | 7            |
| Figure 12S. $^1\text{H}$ NMR of <b>3b</b>                                            | 8            |
| Figure 13S. $^{13}\text{C}$ NMR of <b>3b</b>                                         | 8            |
| Figure 14S. $^1\text{H}$ NMR of <b>4b</b>                                            | 9            |
| Figure 15S. $^1\text{H}$ NMR of <b>5b</b>                                            | 10           |
| Figure 16S. $^{13}\text{C}$ NMR of <b>5b</b>                                         | 10           |
| Figure 17S. $^1\text{H}$ NMR of <b>6</b>                                             | 11           |
| Figure 18S. $^{13}\text{C}$ NMR of <b>6</b>                                          | 11           |
| Figure 19S. $^1\text{H}$ NMR of <b>8</b>                                             | 12           |
| Figure 20S. $^{13}\text{C}$ NMR of <b>8</b>                                          | 12           |
| Figure 21S. $^1\text{H}$ NMR of <b>9a-i</b>                                          | 13           |
| Figure 22S. $^{13}\text{C}$ NMR of <b>9a-i</b>                                       | 13           |
| Figure 23S. $^1\text{H}$ NMR of <b>10a-i</b>                                         | 14           |
| Figure 24S. $^{13}\text{C}$ NMR of <b>10a-i</b>                                      | 14           |
| Figure 25S. $^1\text{H}$ NMR of <b>9b</b>                                            | 15           |
| Figure 26S. $^{13}\text{C}$ NMR of <b>9b</b>                                         | 15           |
| Figure 27S. $^1\text{H}$ NMR of <b>10b</b>                                           | 16           |
| Figure 28S. $^{13}\text{C}$ NMR of <b>10b</b>                                        | 16           |

|                                                                 |    |
|-----------------------------------------------------------------|----|
| Figure 29S. $^1\text{H}$ NMR of <b>11a-i</b> , <b>11a-ii</b>    | 17 |
| Figure 30S. $^{13}\text{C}$ NMR of <b>11a-i</b> , <b>11a-ii</b> | 17 |
| Figure 31S. $^1\text{H}$ NMR of <b>12a-i</b> , <b>12a-ii</b>    | 18 |
| Figure 32S. $^{13}\text{C}$ NMR of <b>12a-i</b> , <b>12a-ii</b> | 18 |
| Figure 33S. MALDI-TOF Spectrum of oligomer, <b>PNA2a</b>        | 19 |
| Figure 34S. MALDI-TOF Spectrum of oligomer, <b>PNA2b</b>        | 20 |
| Figure 35S. MALDI-TOF Spectrum of oligomer, <b>PNA3a</b>        | 21 |
| Figure 36S. MALDI-TOF Spectrum of oligomer, <b>PNA3b</b>        | 22 |
| Figure 37S. $^1\text{H}$ NMR of <b>14a-i</b>                    | 23 |
| Figure 38S. $^{13}\text{C}$ NMR of <b>14a-i</b>                 | 23 |

**Figure 1S.**  $^{19}\text{F}$ -NMR of MTPA-derivatized D- and L-alaninol intermediates.

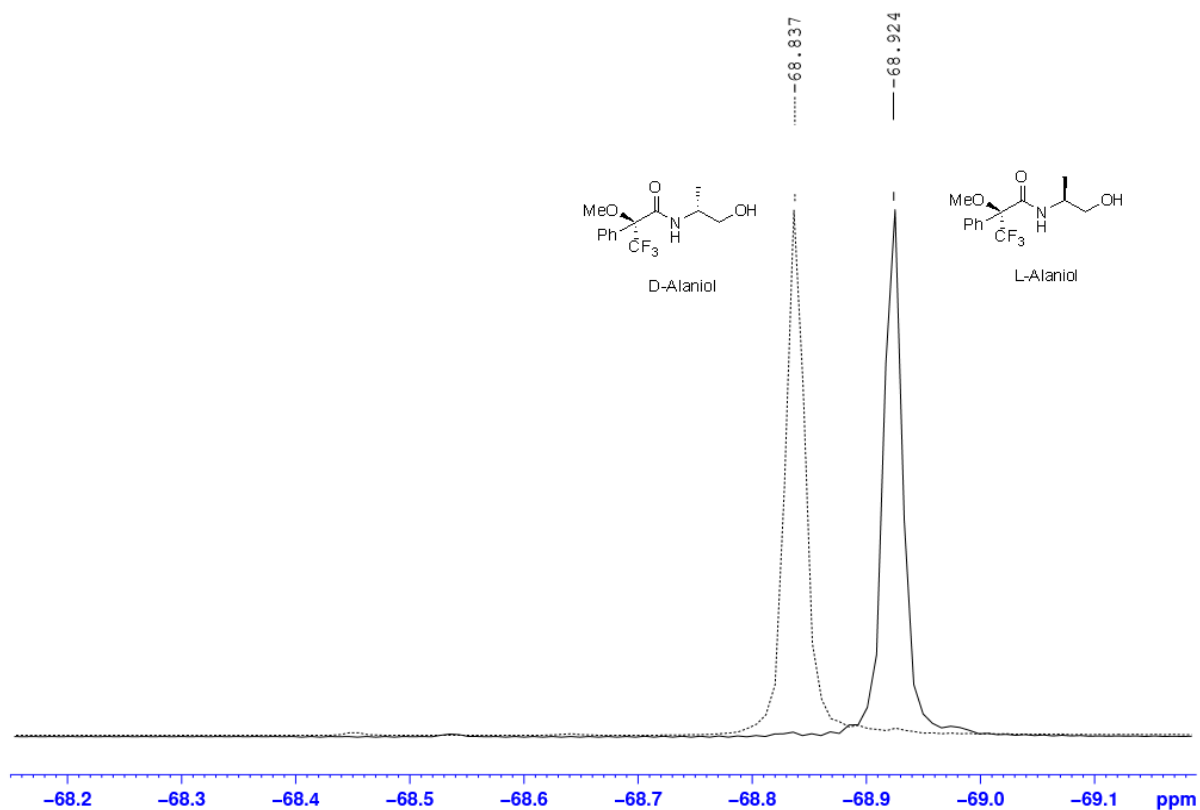

Figure2S.  $^1\text{H}$  NMR Spectrum of compound **2a** ( $\text{CDCl}_3$ , 300 MHz)

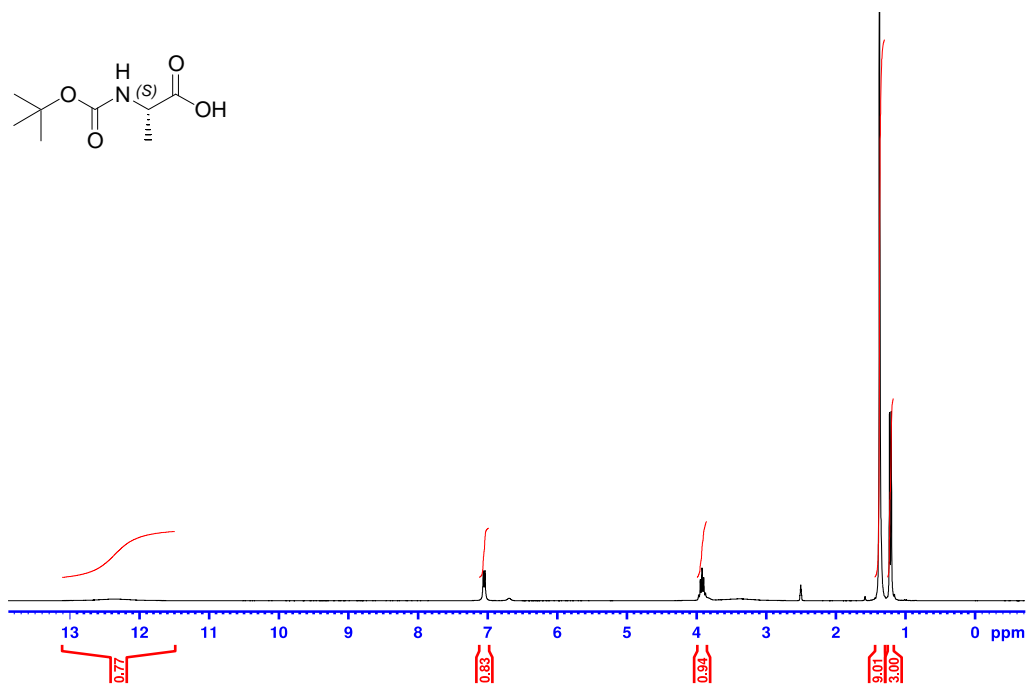

Figure3S.  $^{13}\text{C}$  NMR Spectrum of compound **2a** ( $\text{DMSO-d}_6$ , 75 MHz)

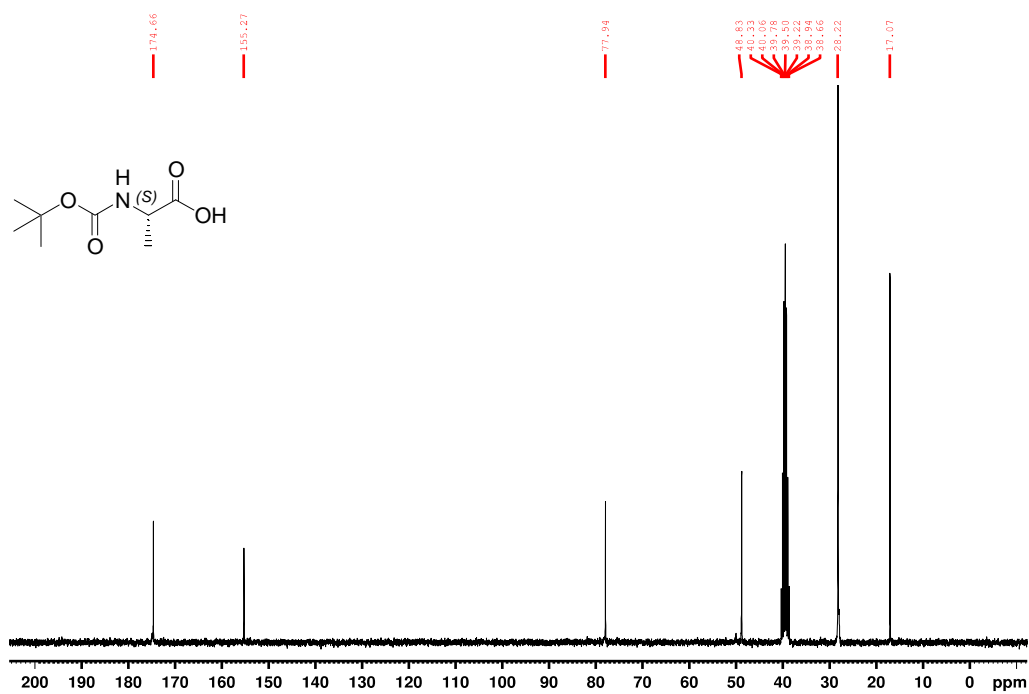

**Figure4S.**  $^1\text{H}$  NMR Spectrum of compound **3a** ( $\text{CDCl}_3$ , 300 MHz)

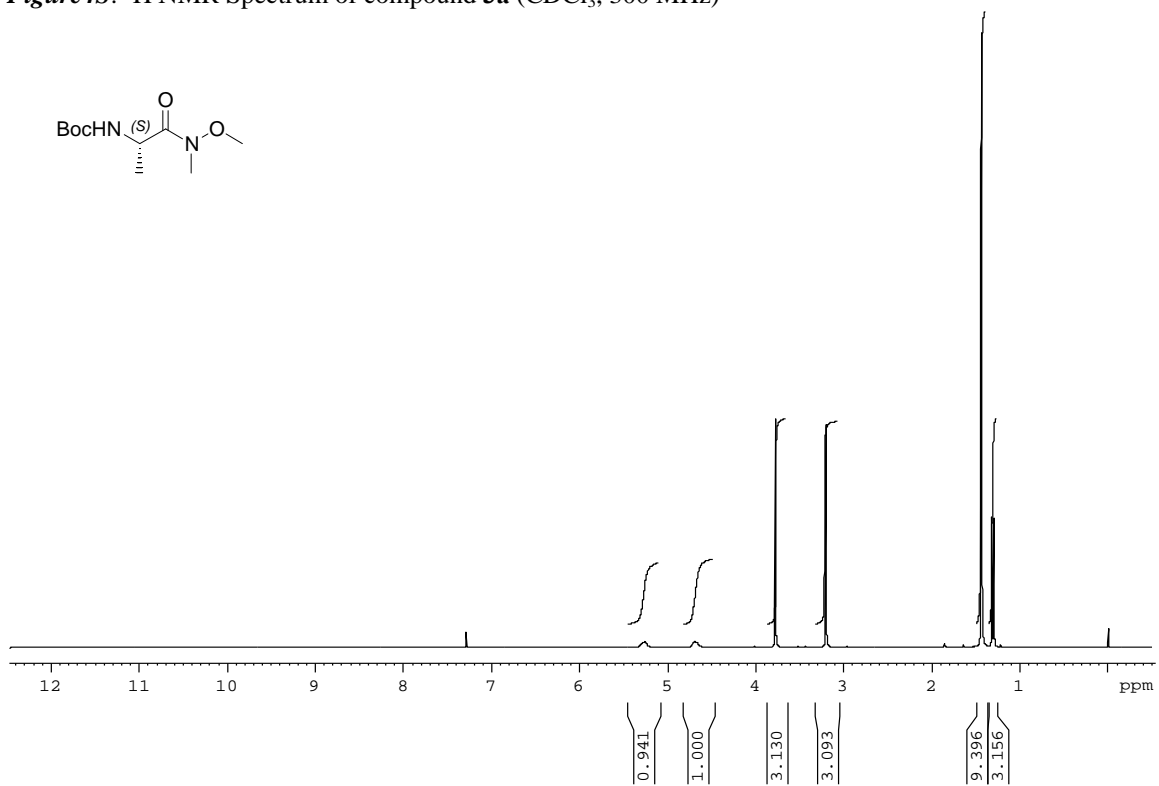

**Figure5S.**  $^{13}\text{C}$  NMR Spectrum of compound **3a** ( $\text{CDCl}_3$ , 75 MHz)

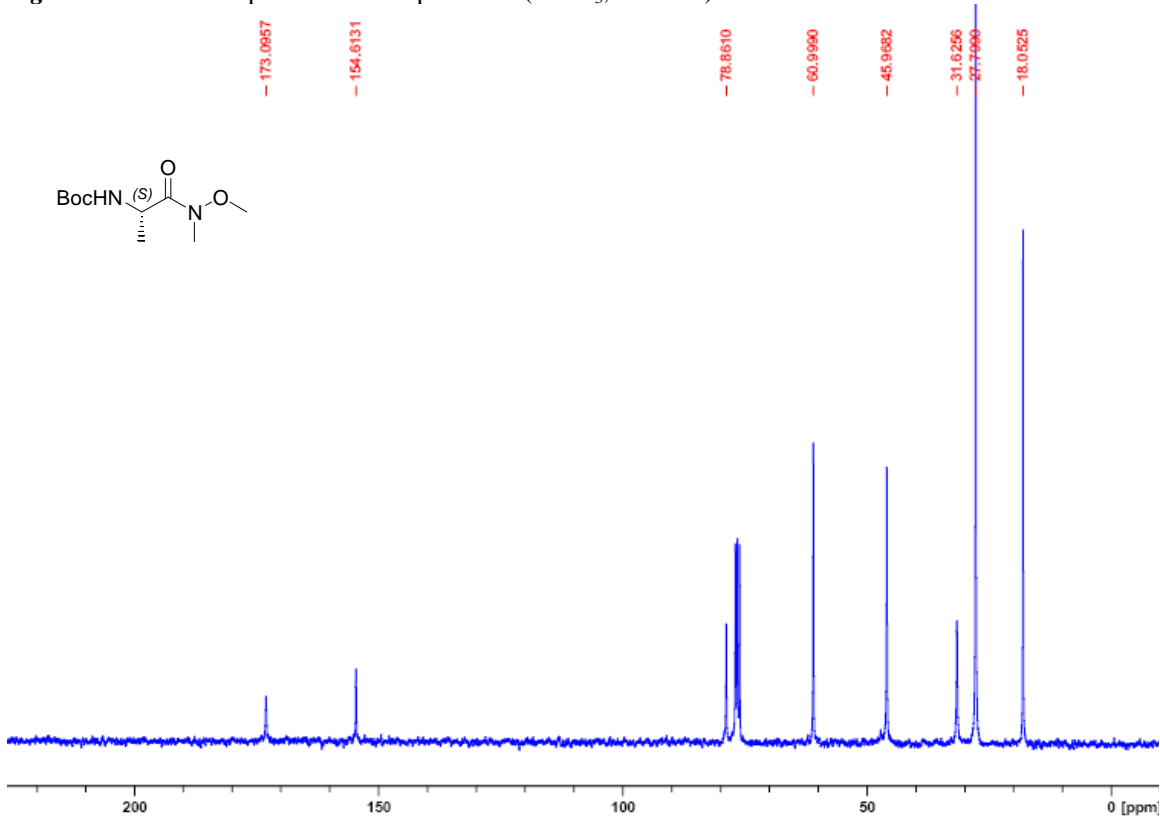

**Figure6S.**  $^1\text{H}$  NMR Spectrum of compound **4a-i** ( $\text{CDCl}_3$ , 300 MHz)

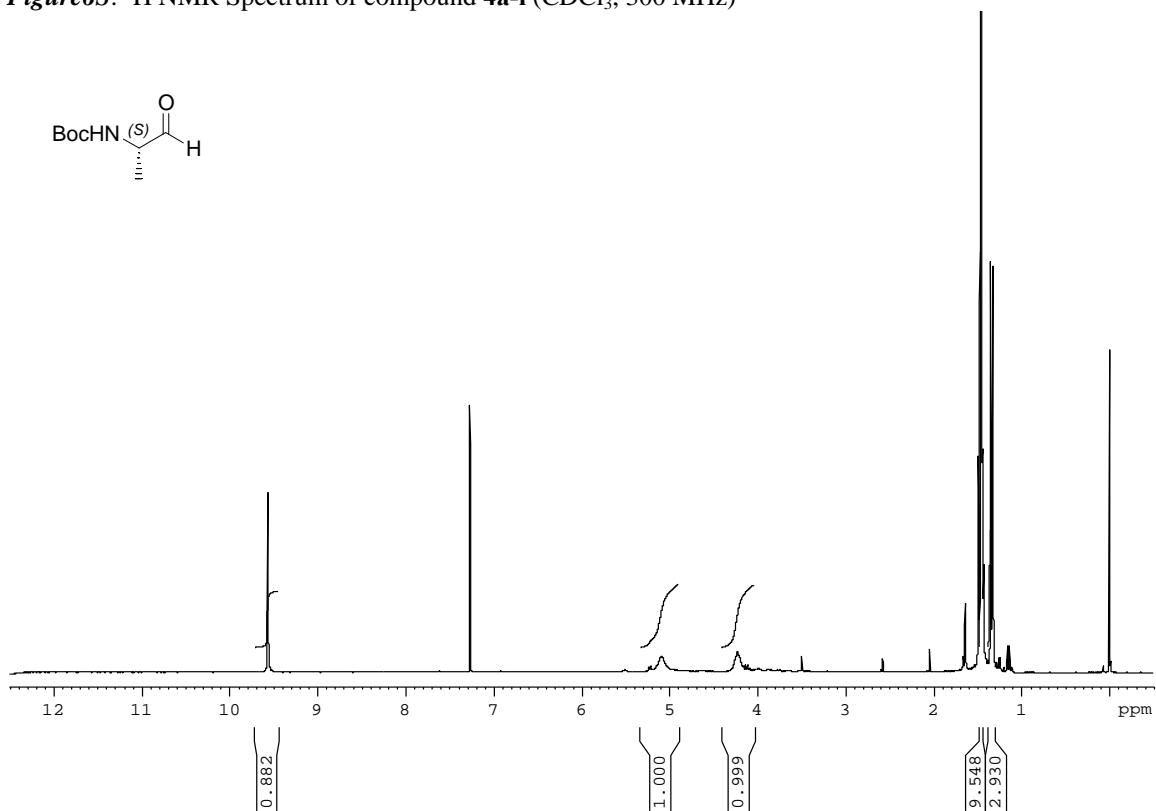

**Figure7S.**  $^{13}\text{C}$  NMR Spectrum of compound **4a-i** ( $\text{CDCl}_3$ , 75 MHz)

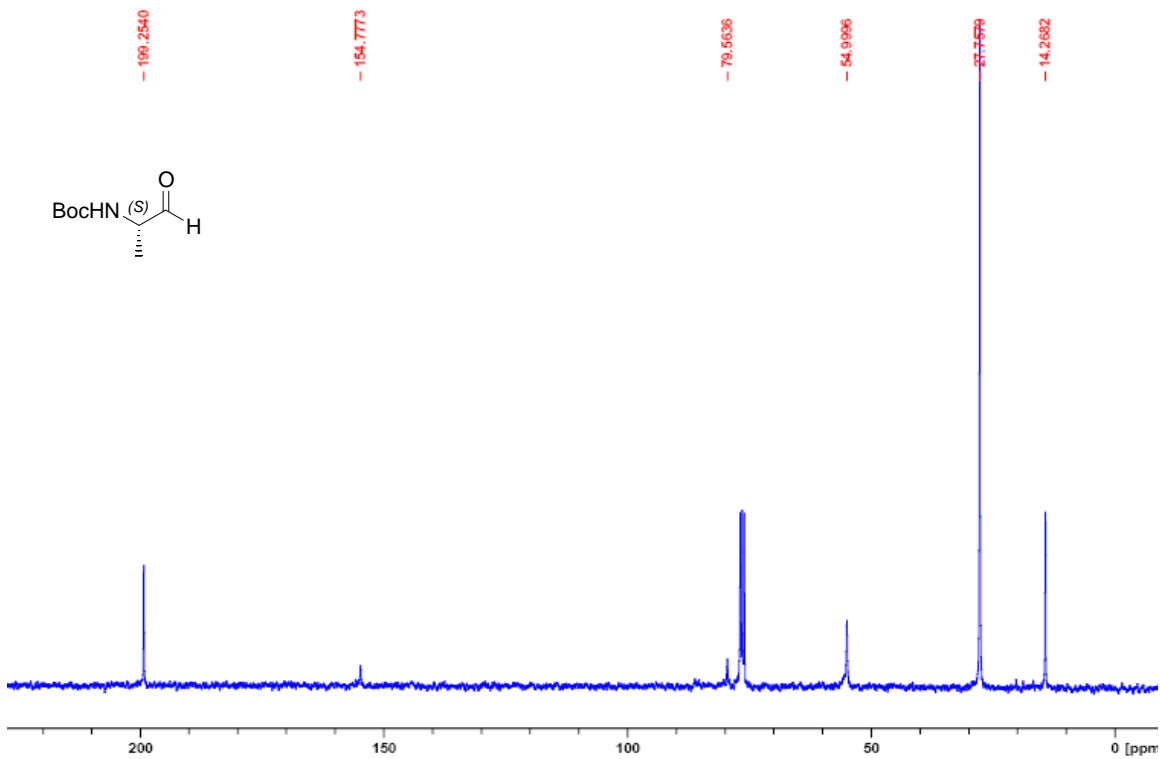

**Figure8S.**  $^1\text{H}$  NMR Spectrum of compound **5a-i** ( $\text{CDCl}_3$ , 300 MHz)

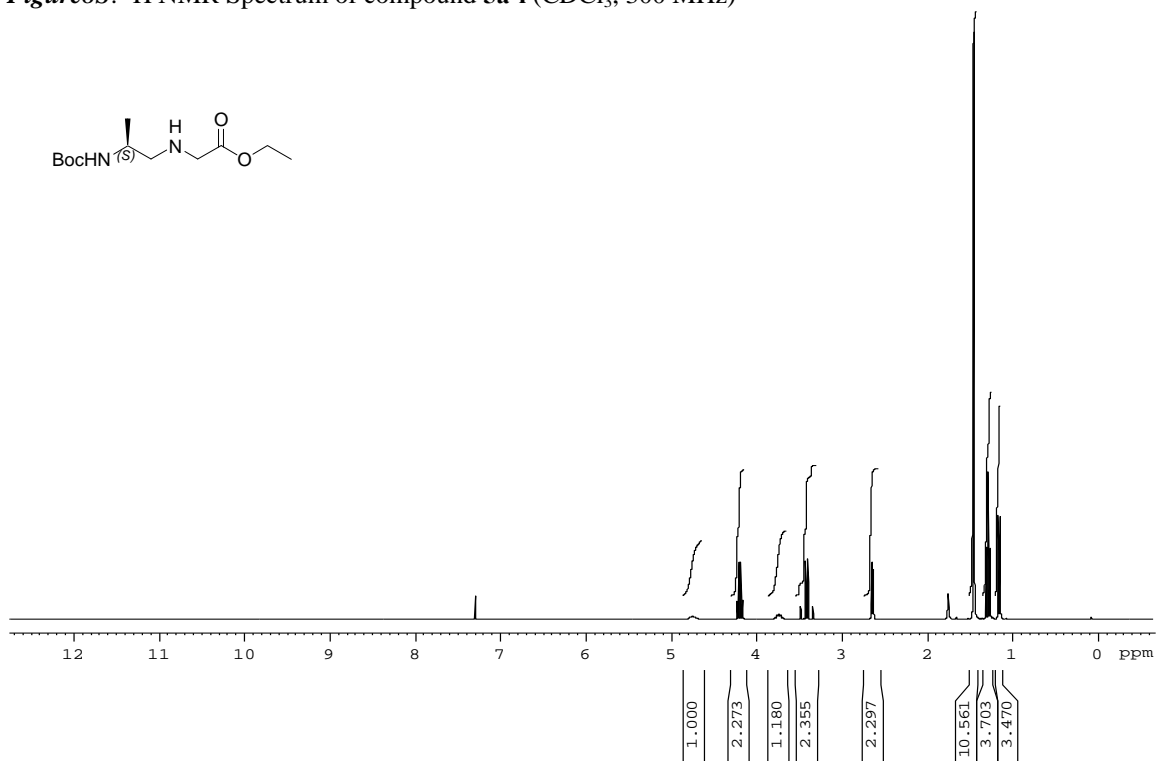

**Figure9S.**  $^{13}\text{C}$  NMR Spectrum of compound **5a-i** ( $\text{CDCl}_3$ , 75 MHz)

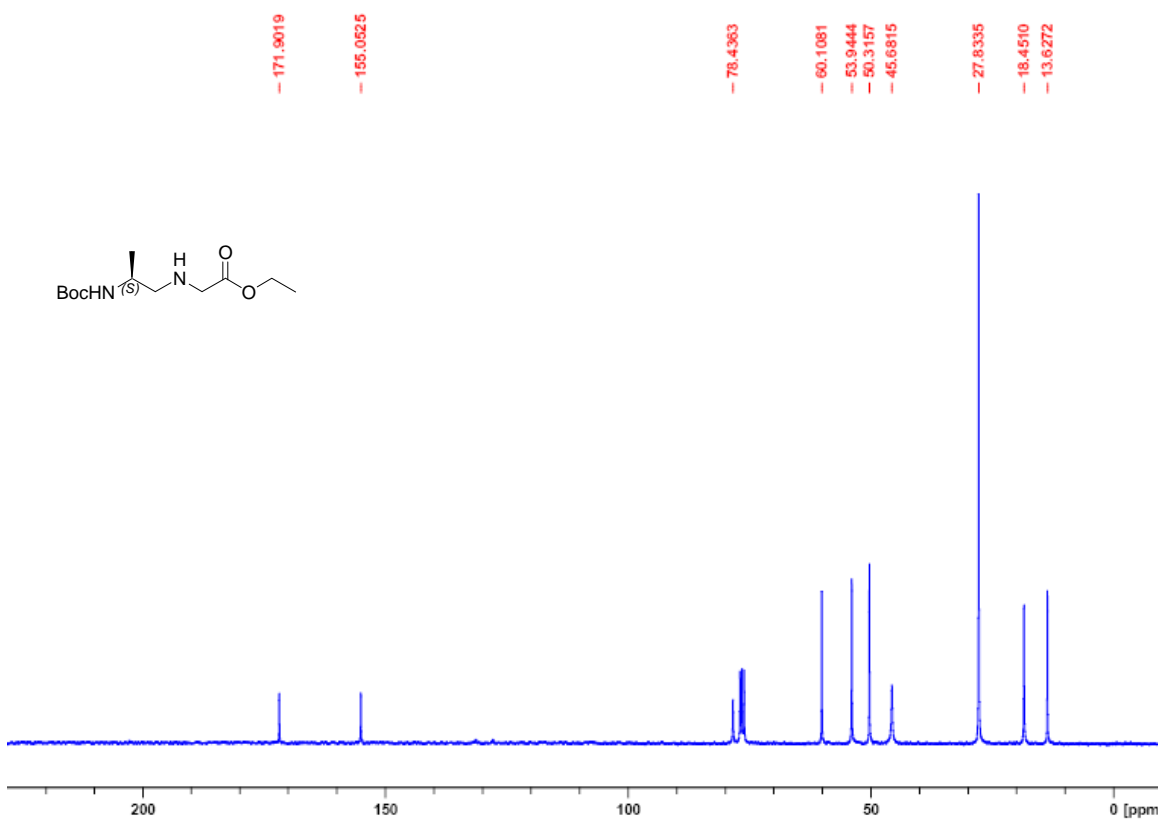

**Figure 10S.**  $^1\text{H}$  NMR Spectrum of compound **2b** ( $\text{CDCl}_3$ , 300 MHz)

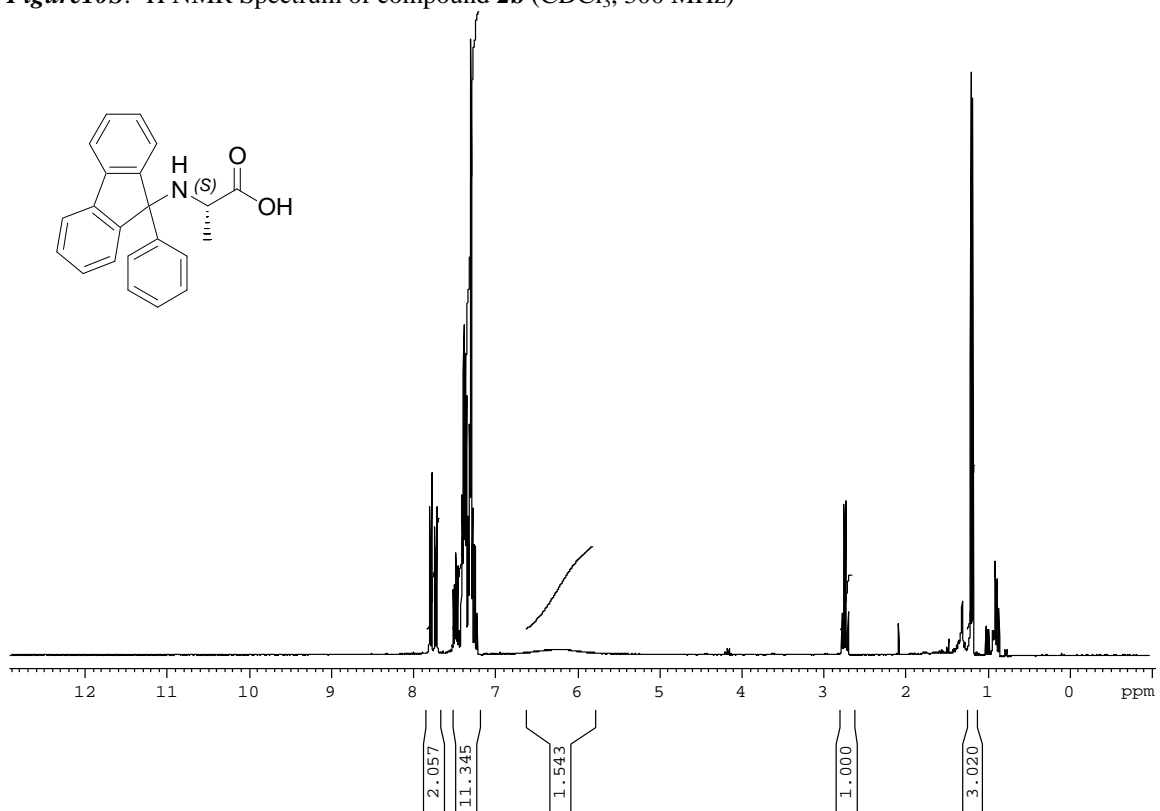

**Figure 11S.**  $^{13}\text{C}$  NMR Spectrum of compound **2b** ( $\text{DMSO-d}_6$ , 75 MHz)

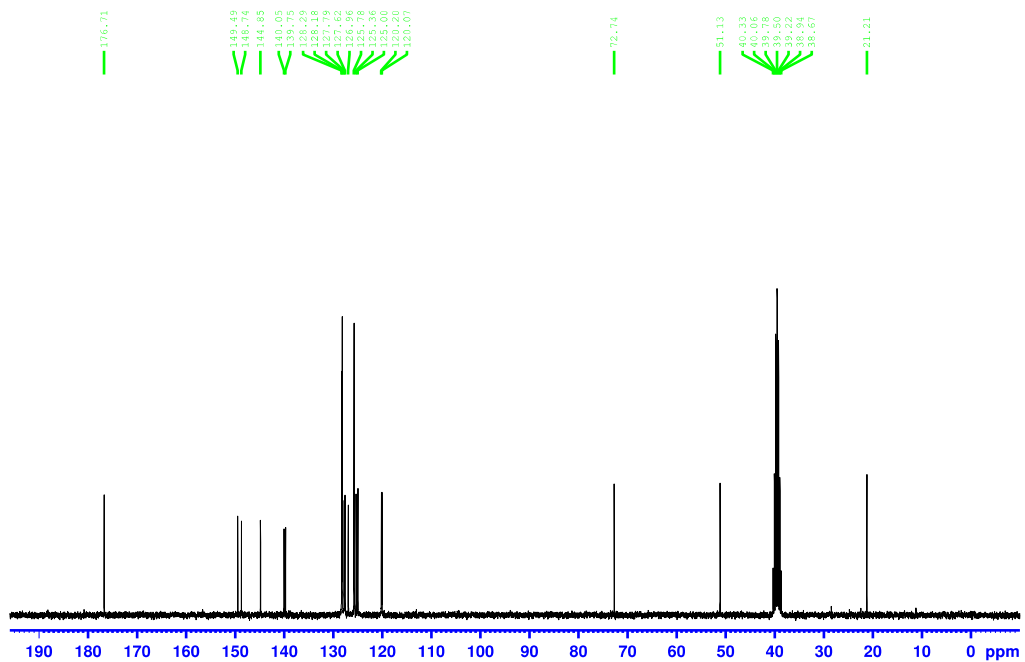

Figure 12S. <sup>1</sup>H NMR Spectrum of compound **3b** (CDCl<sub>3</sub>, 300 MHz)

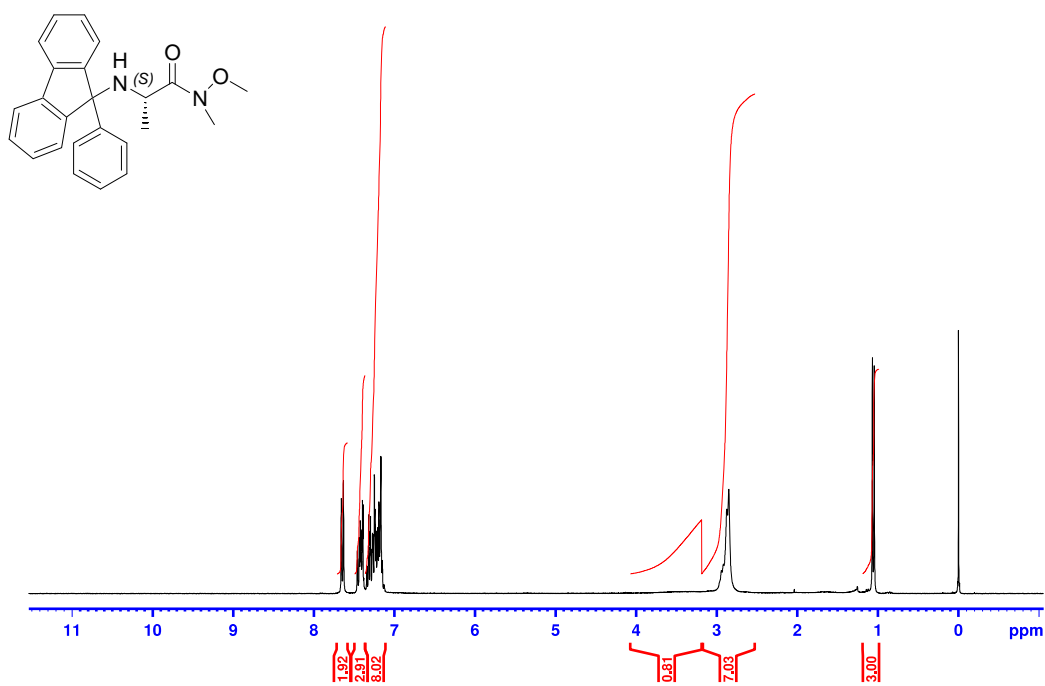

Figure 13S. <sup>13</sup>C NMR Spectrum of compound **3b** (CDCl<sub>3</sub>, 75 MHz)

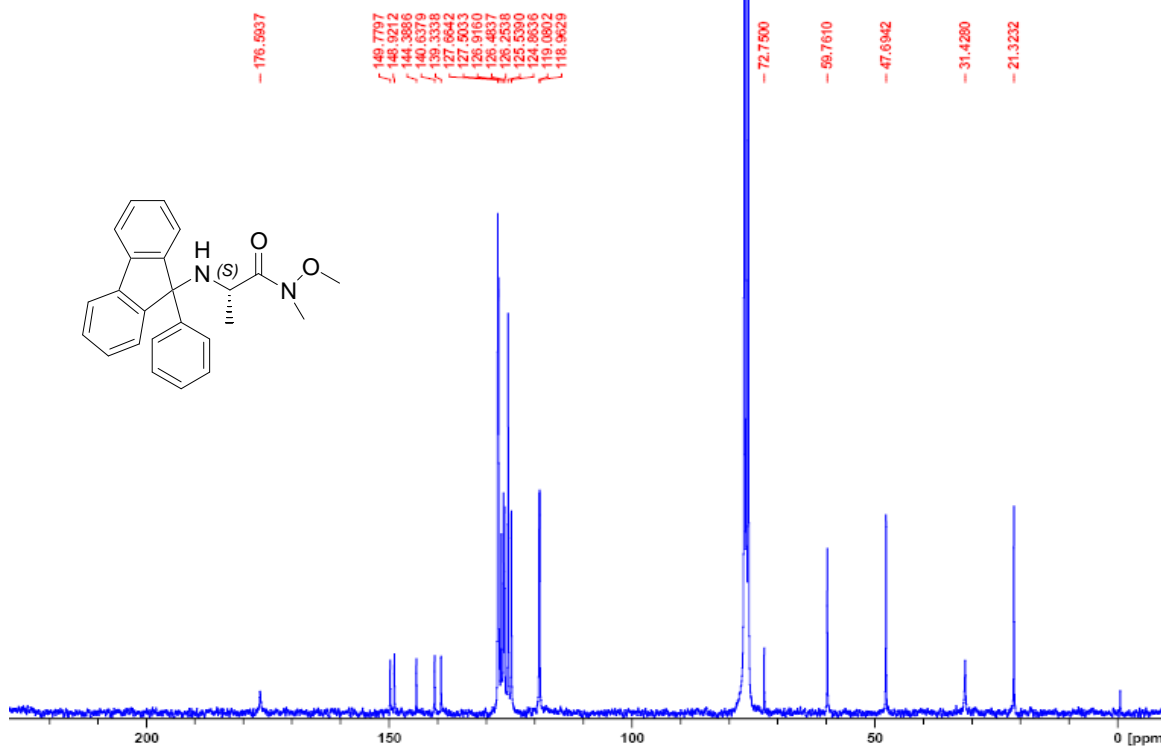



Figure 14S.  $^1\text{H}$  NMR Spectrum of compound **4b** ( $\text{CDCl}_3$ , 300 MHz)

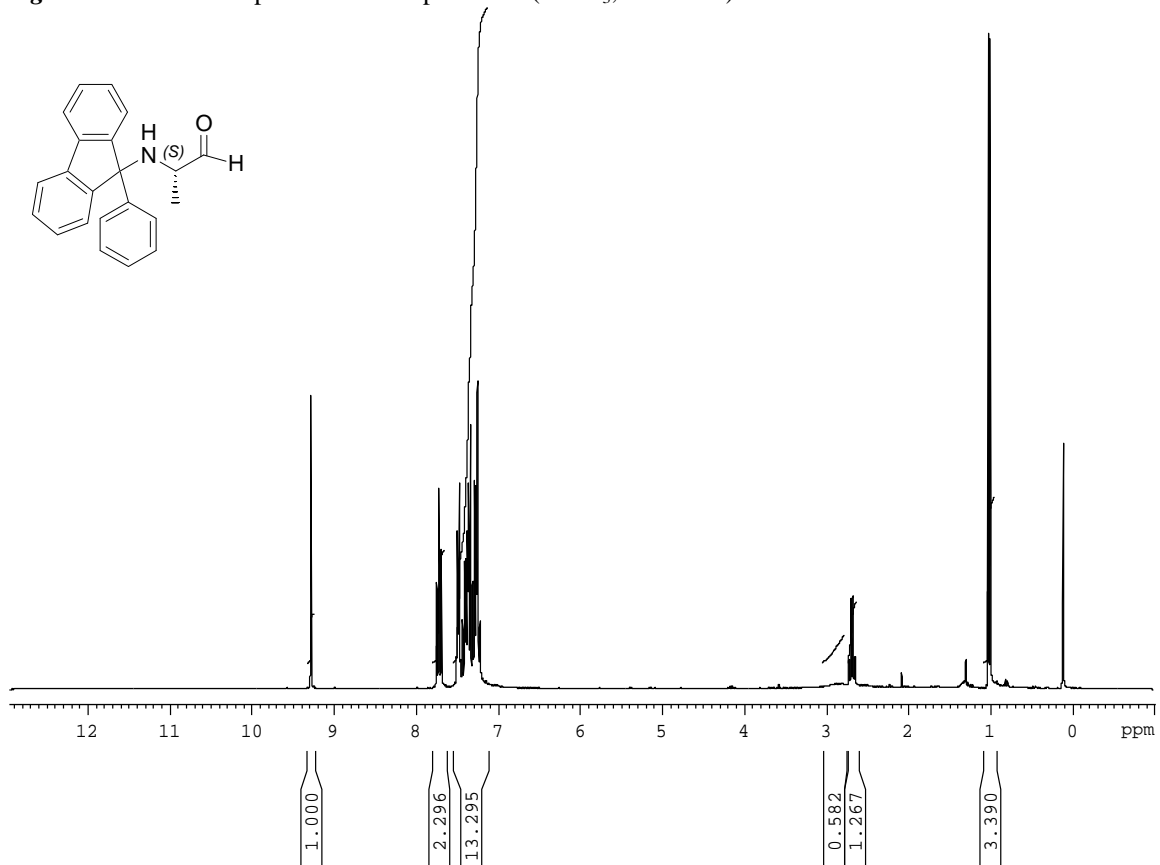

Figure15S. <sup>1</sup>H NMR Spectrum of compound 5b (CDCl<sub>3</sub>, 300 MHz)

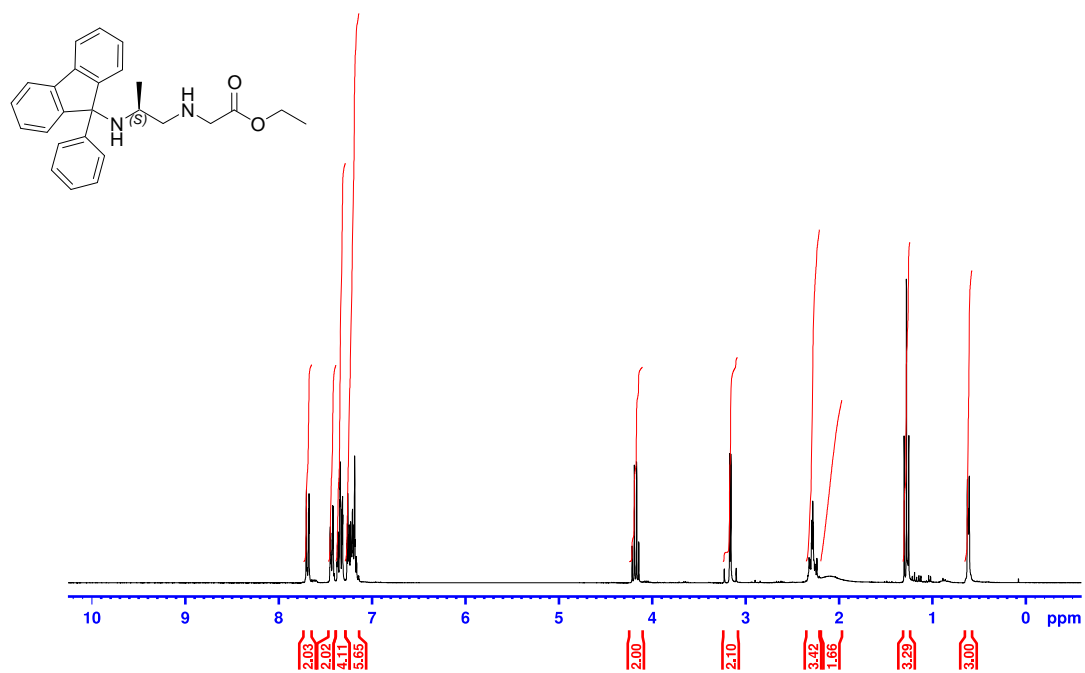

Figure16S. <sup>13</sup>C NMR Spectrum of compound 5b (CDCl<sub>3</sub>, 75 MHz)

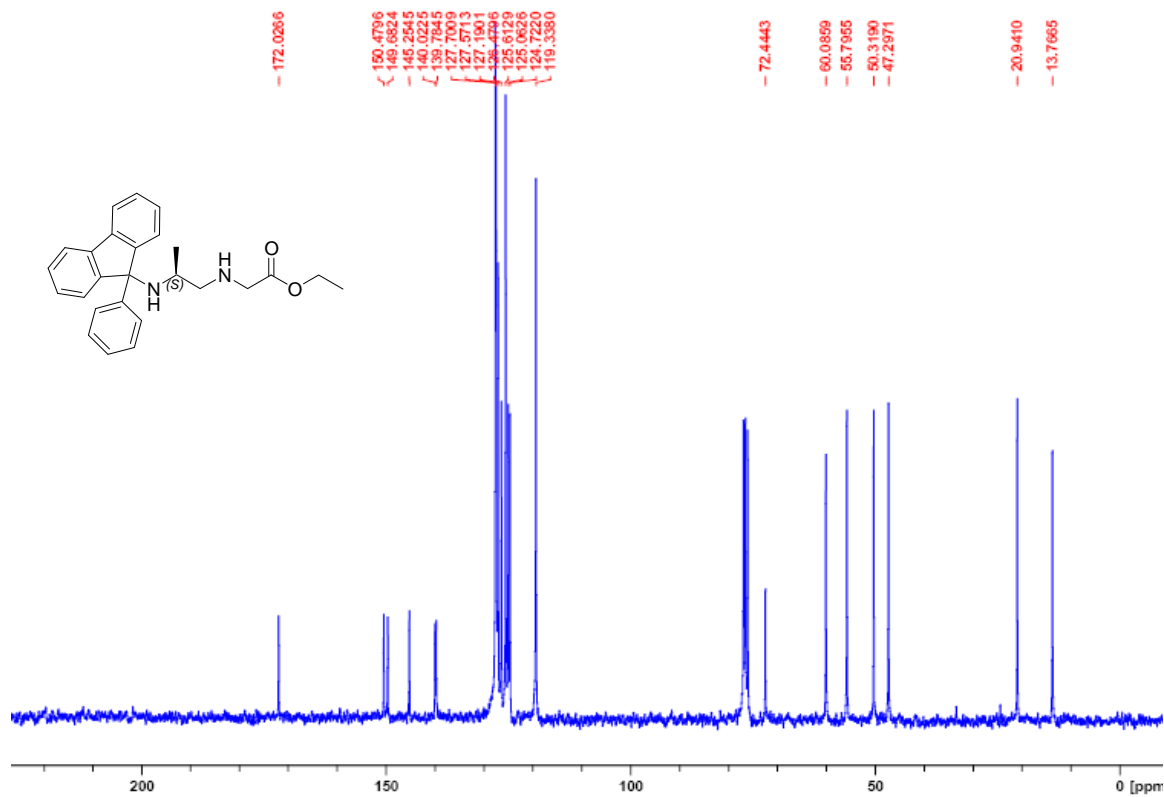

Figure 17S.  $^1\text{H}$  NMR Spectrum of compound **6** ( $\text{CDCl}_3$ , 300 MHz)

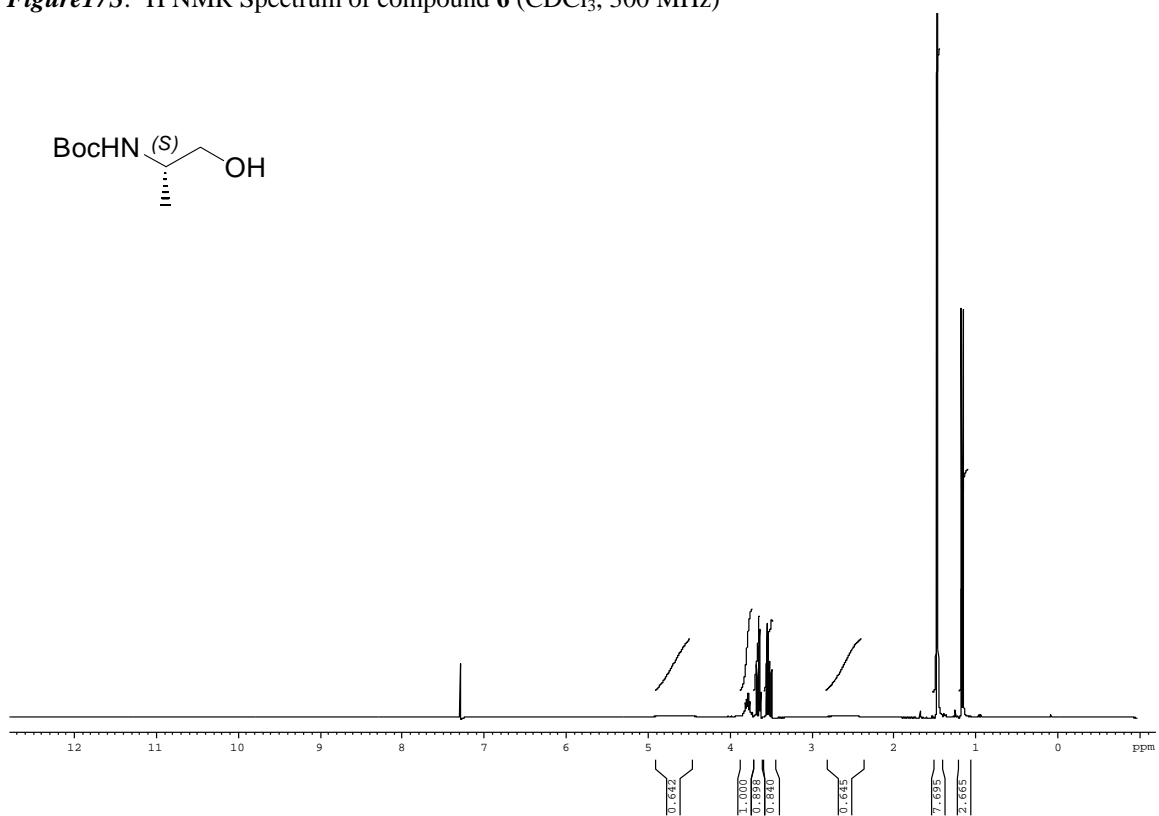

Figure 18S.  $^{13}\text{C}$  NMR Spectrum of compound **6** ( $\text{CDCl}_3$ , 75 MHz)

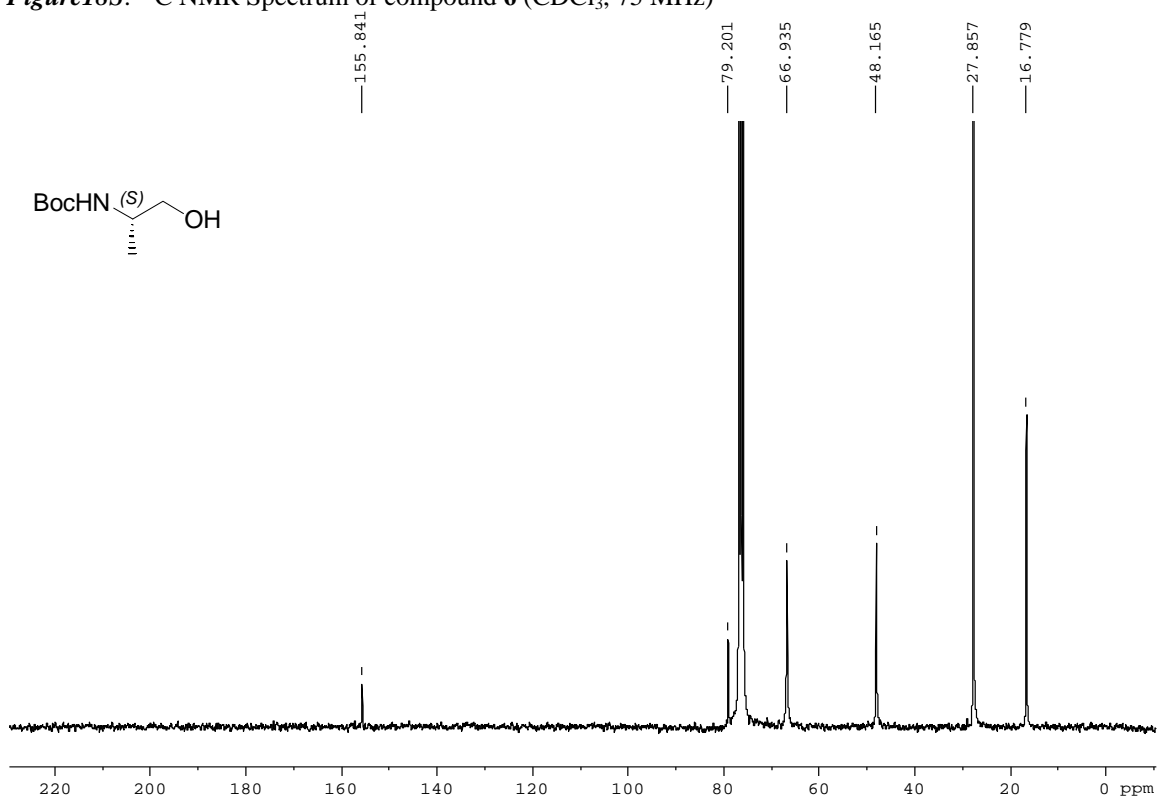

Figure19S.  $^1\text{H}$  NMR of compound **8** ( $\text{CDCl}_3$ , 300 MHz)

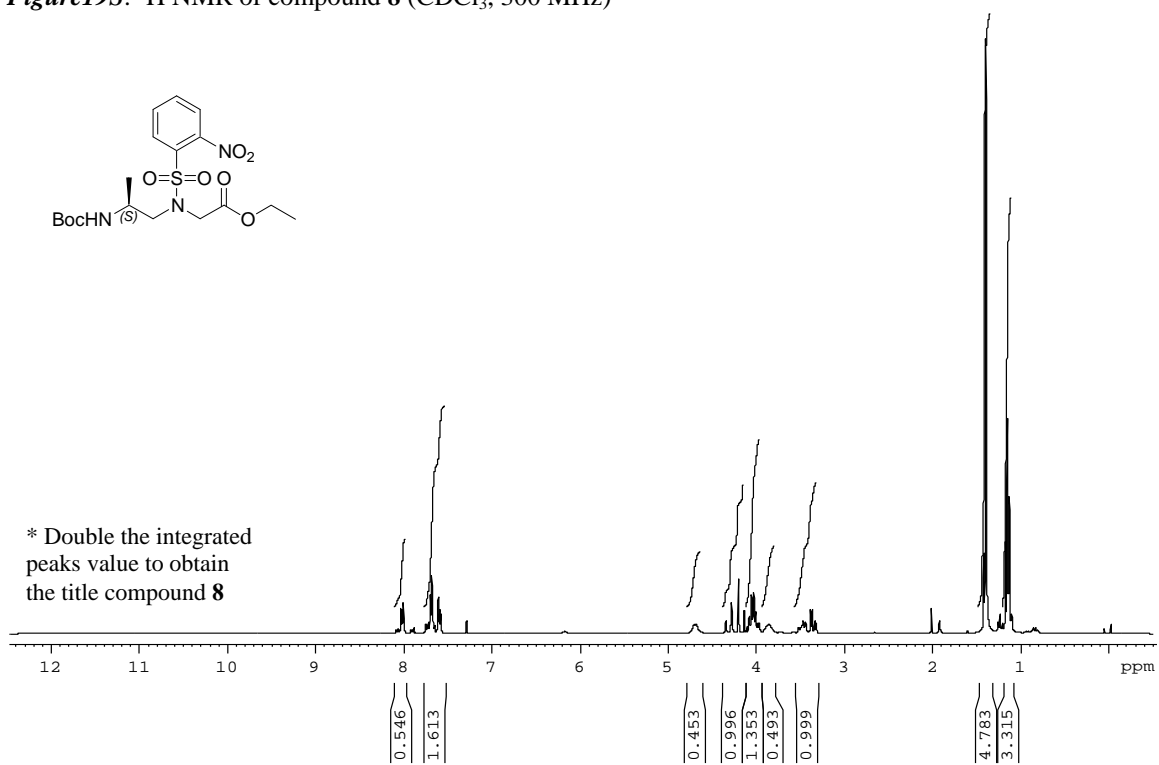

Figure20S.  $^{13}\text{C}$  NMR of compound **8** ( $\text{CDCl}_3$ , 75 MHz)

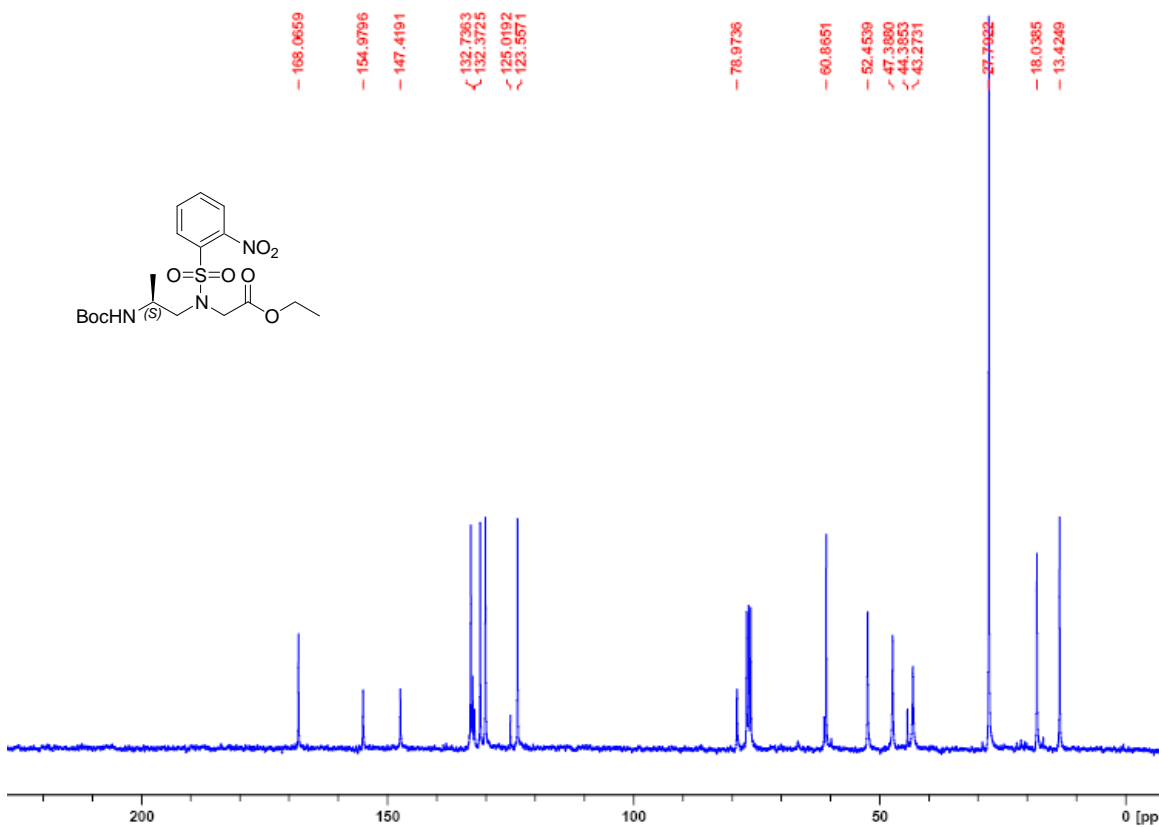

Figure 21S. <sup>1</sup>H NMR Spectrum of compound 9a-i (DMSO-d<sub>6</sub>, 300 MHz)

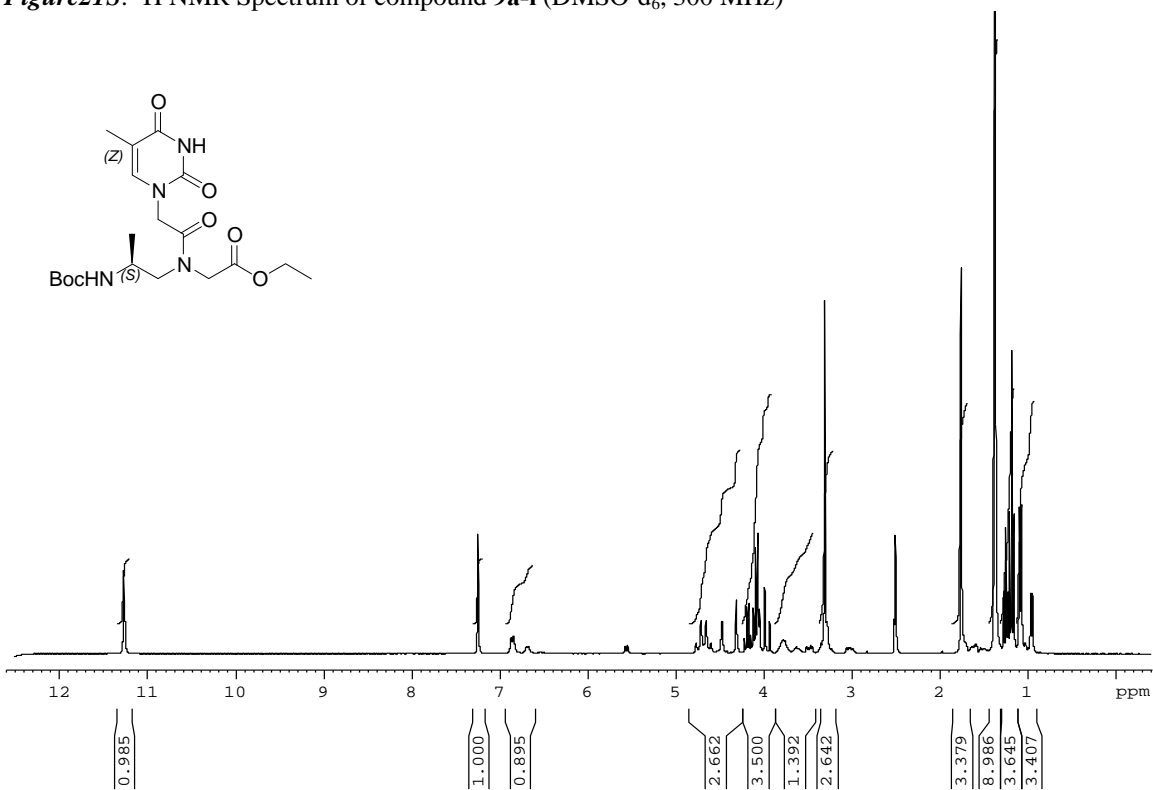

Figure 22S. <sup>13</sup>C NMR Spectrum of compound 9a-i (DMSO-d<sub>6</sub>, 75 MHz)

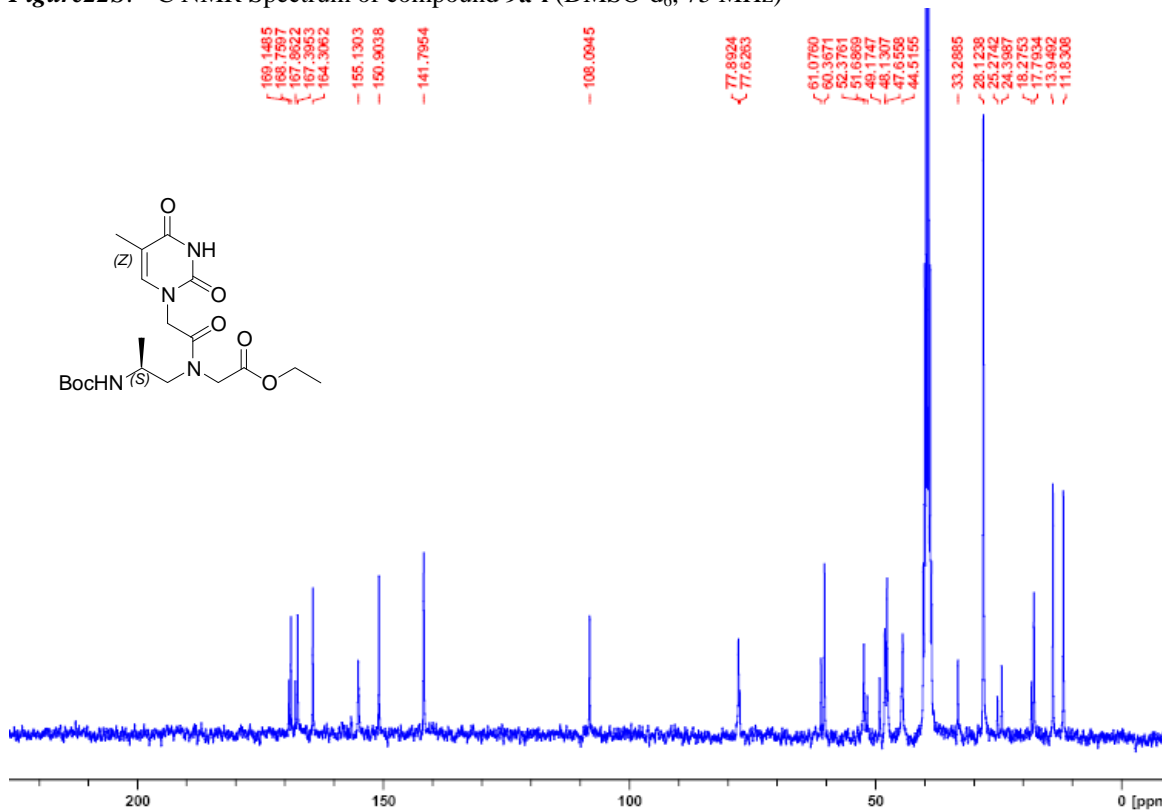

Figure 23S.  $^1\text{H}$  NMR Spectrum of compound **10a-i** (DMSO- $d_6$ , 300 MHz)

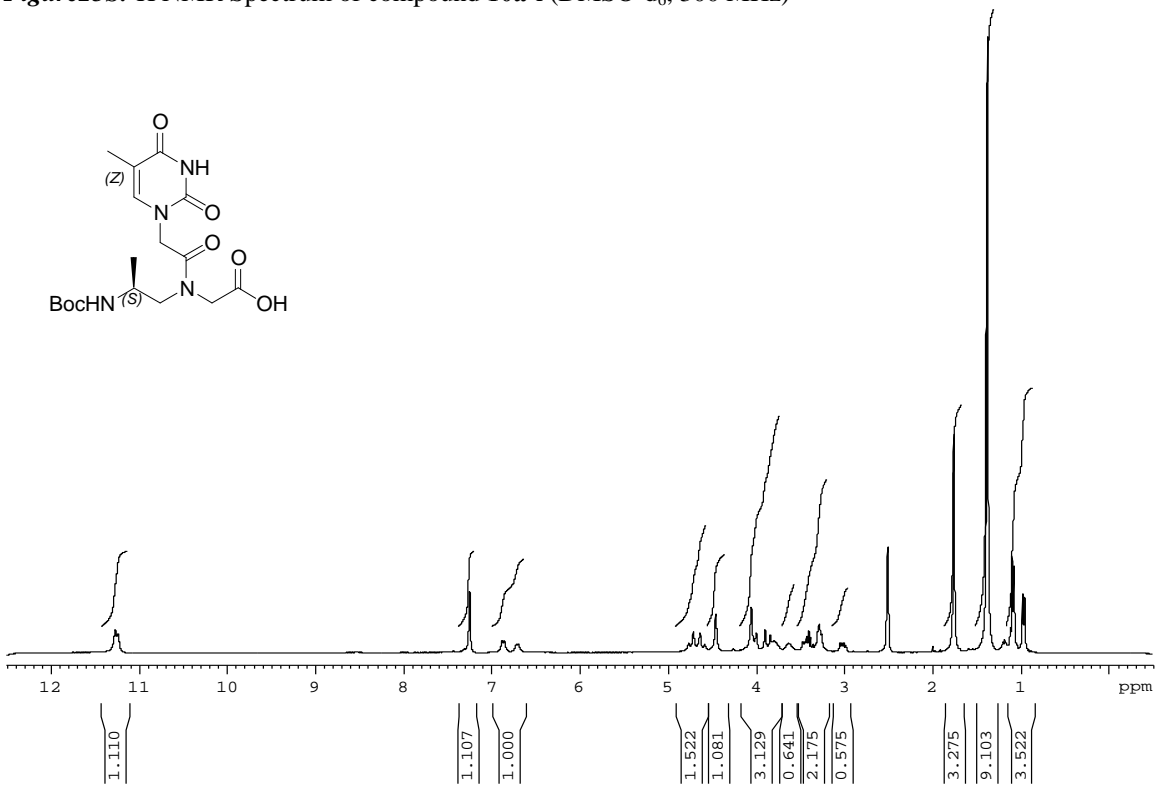

Figure 24S.  $^{13}\text{C}$  NMR Spectrum of compound **10a-i** (DMSO- $d_6$ , 75 MHz)

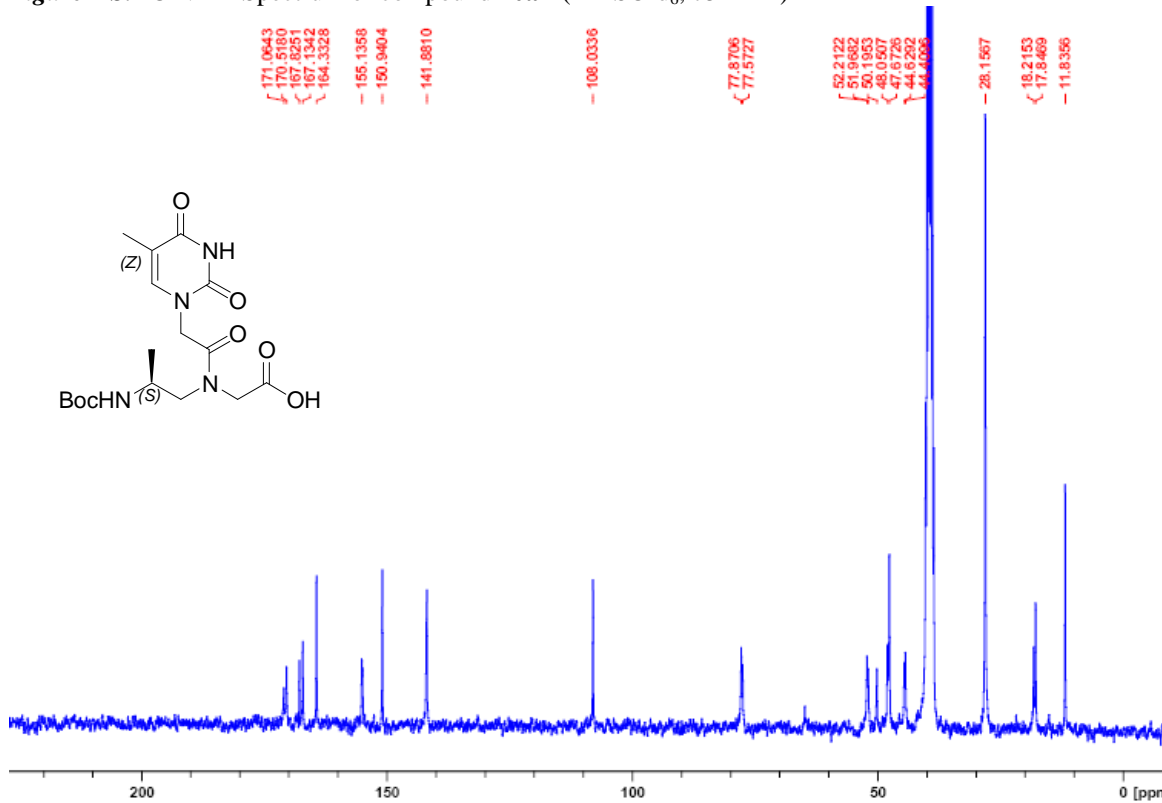

Figure25S. <sup>1</sup>H NMR Spectrum of compound **9b** (CDCl<sub>3</sub>, 300 MHz)

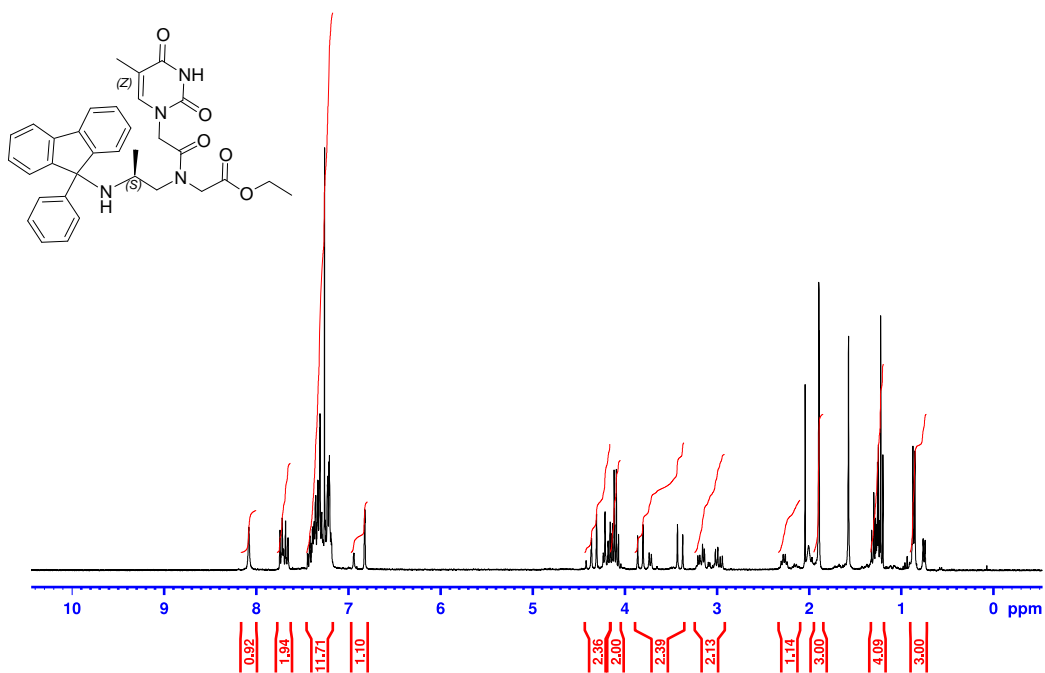

Figure26S. <sup>13</sup>C NMR Spectrum of compound **9b** (DMSO-d<sub>6</sub>, 75 MHz)

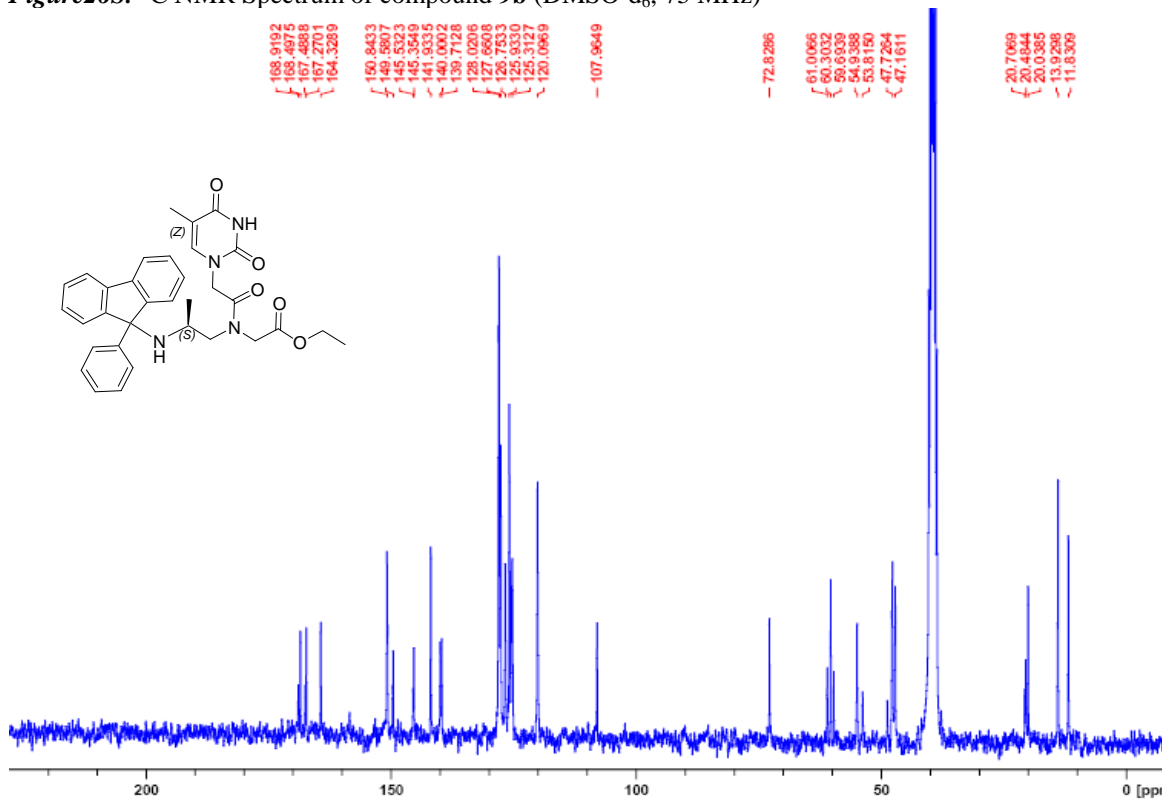

Figure 27S. <sup>1</sup>H NMR Spectrum of compound 10b (DMSO-d<sub>6</sub>, 300 MHz)

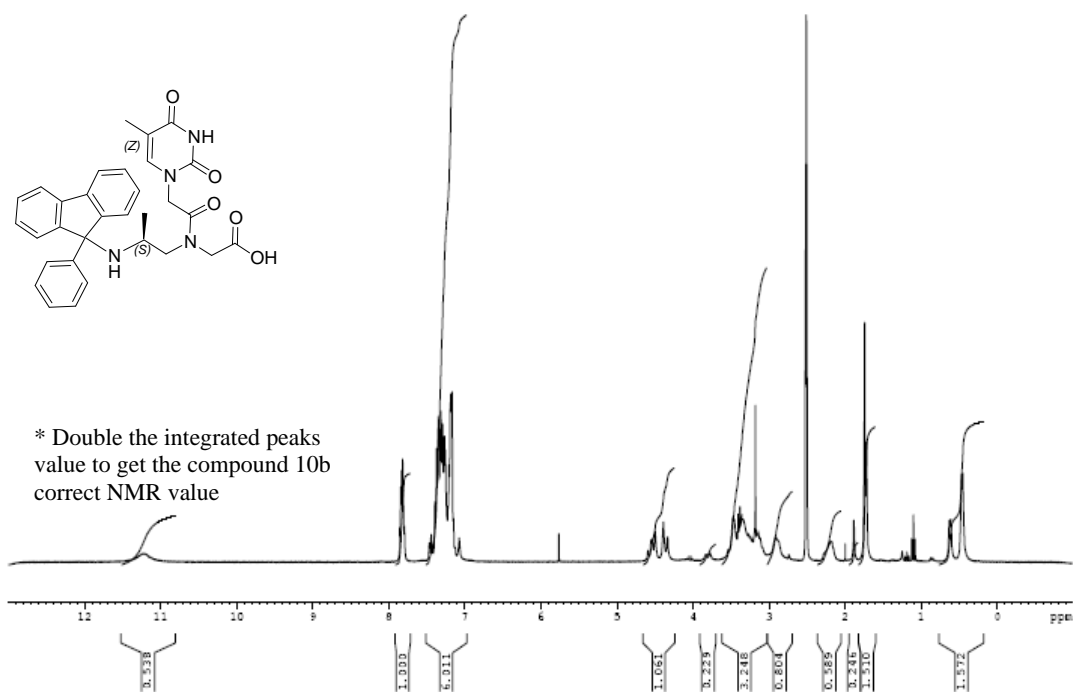

Figure 28S. <sup>13</sup>C NMR Spectrum of compound 10b (DMSO-d<sub>6</sub>, 75 MHz)

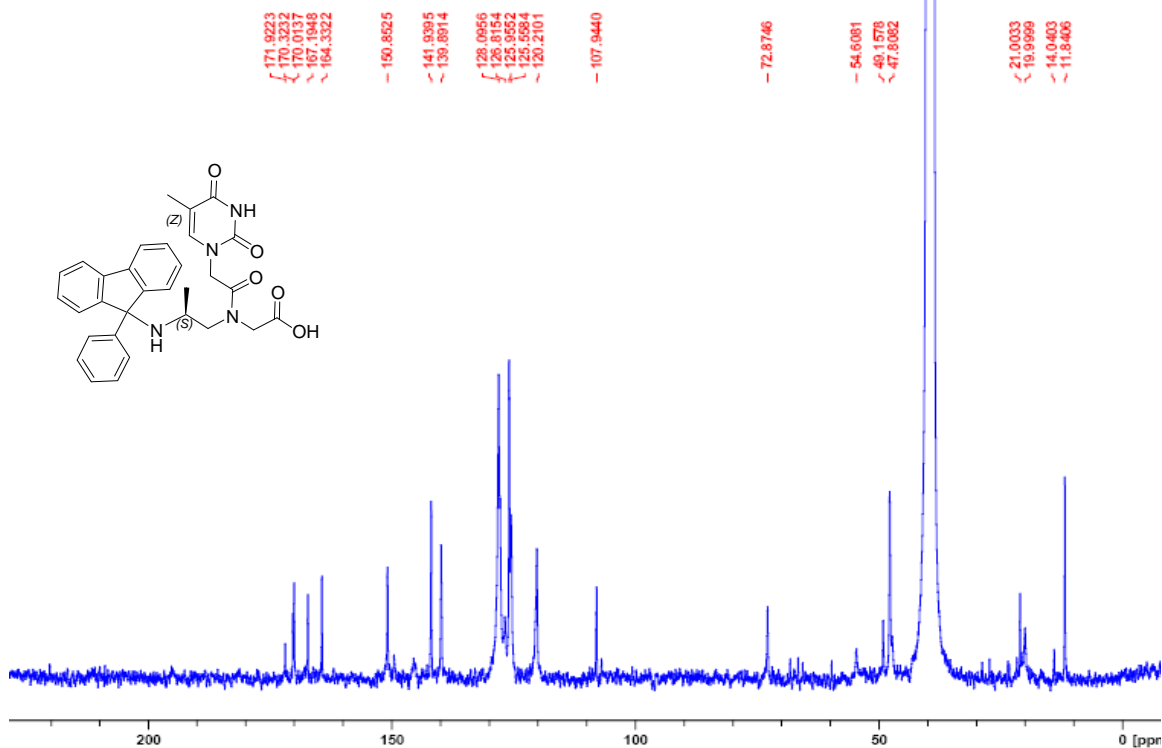



Figure 29S. <sup>1</sup>H NMR Spectrum of compound 11a-i, 11a-ii (DMSO-d<sub>6</sub>, 300 MHz)

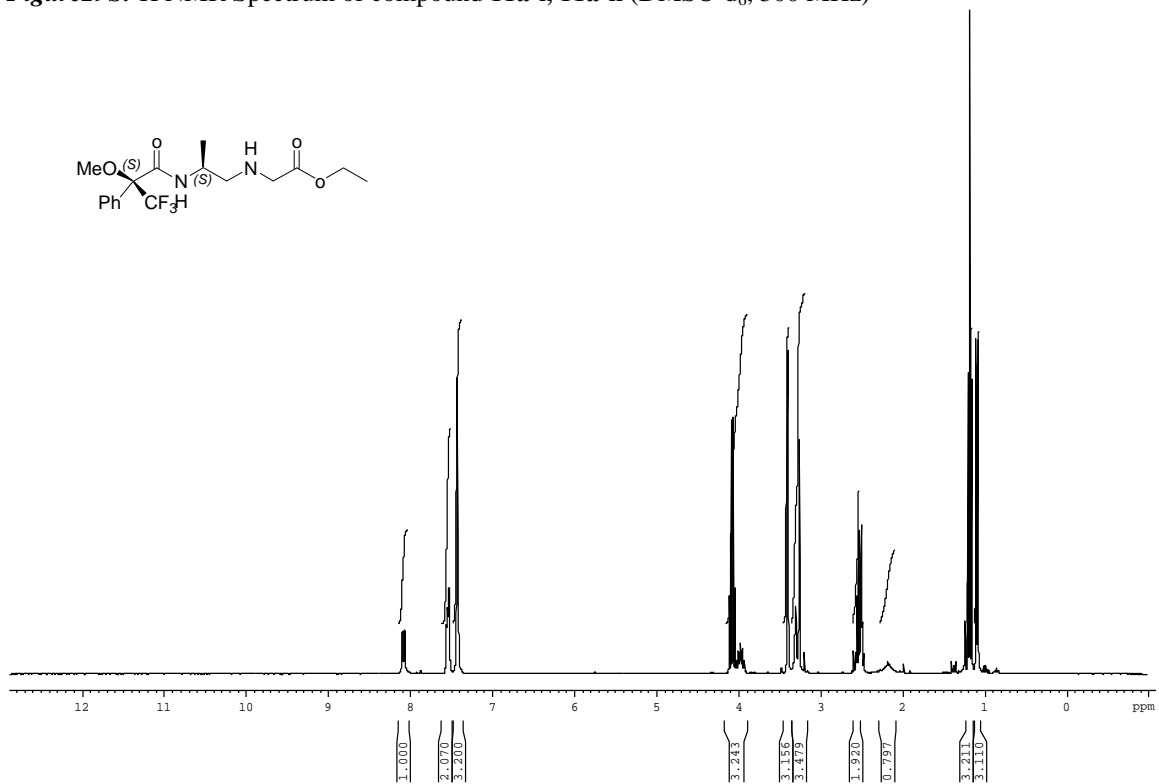

Figure 30S. <sup>13</sup>C NMR Spectrum of compound 11a-i, 11a-ii (DMSO-d<sub>6</sub>, 75 MHz)

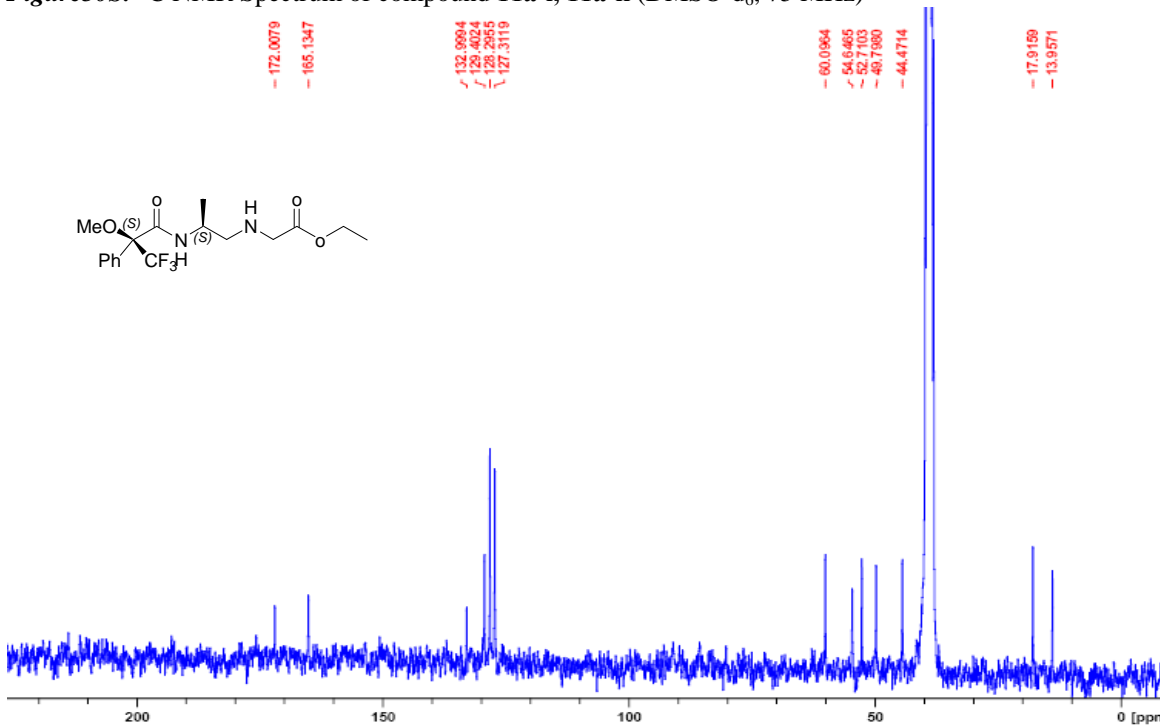

Figure 31S. <sup>1</sup>H NMR Spectrum of compound 12a-i, 12a-ii (DMSO-d<sub>6</sub>, 300 MHz)

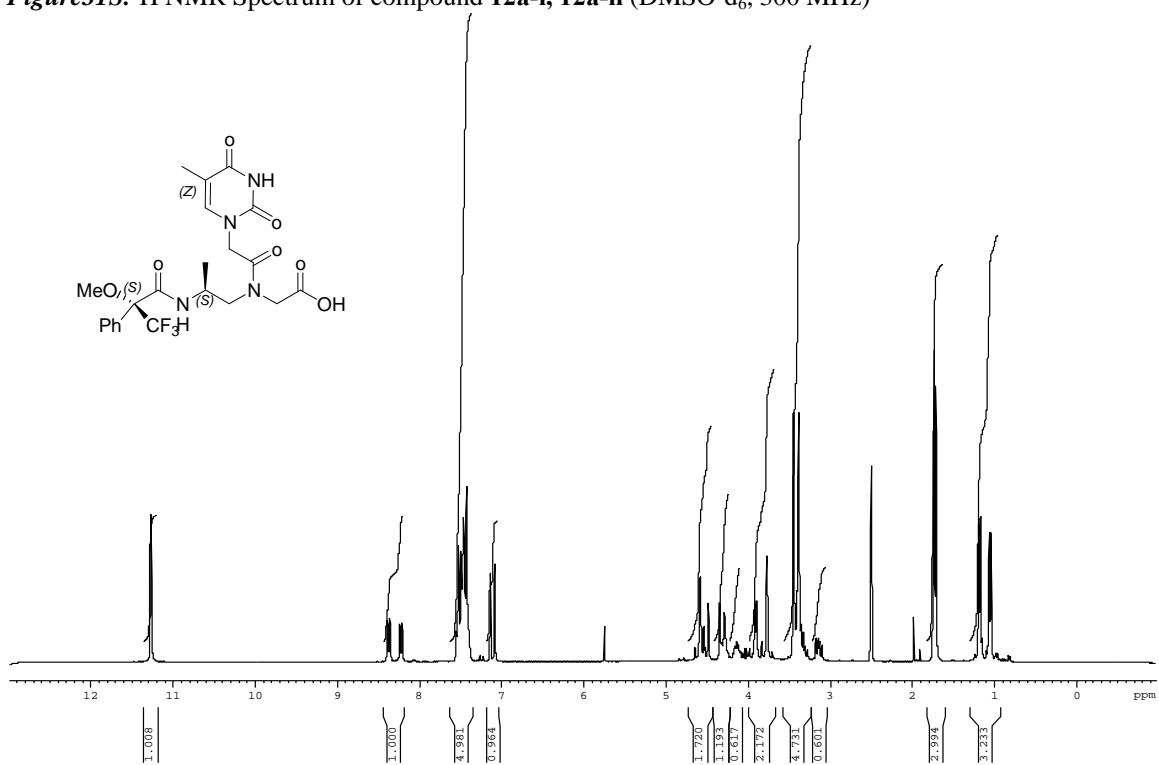

Figure 32S. <sup>13</sup>C NMR Spectrum of compound 12a-i, 12a-ii (DMSO-d<sub>6</sub>, 75 MHz)

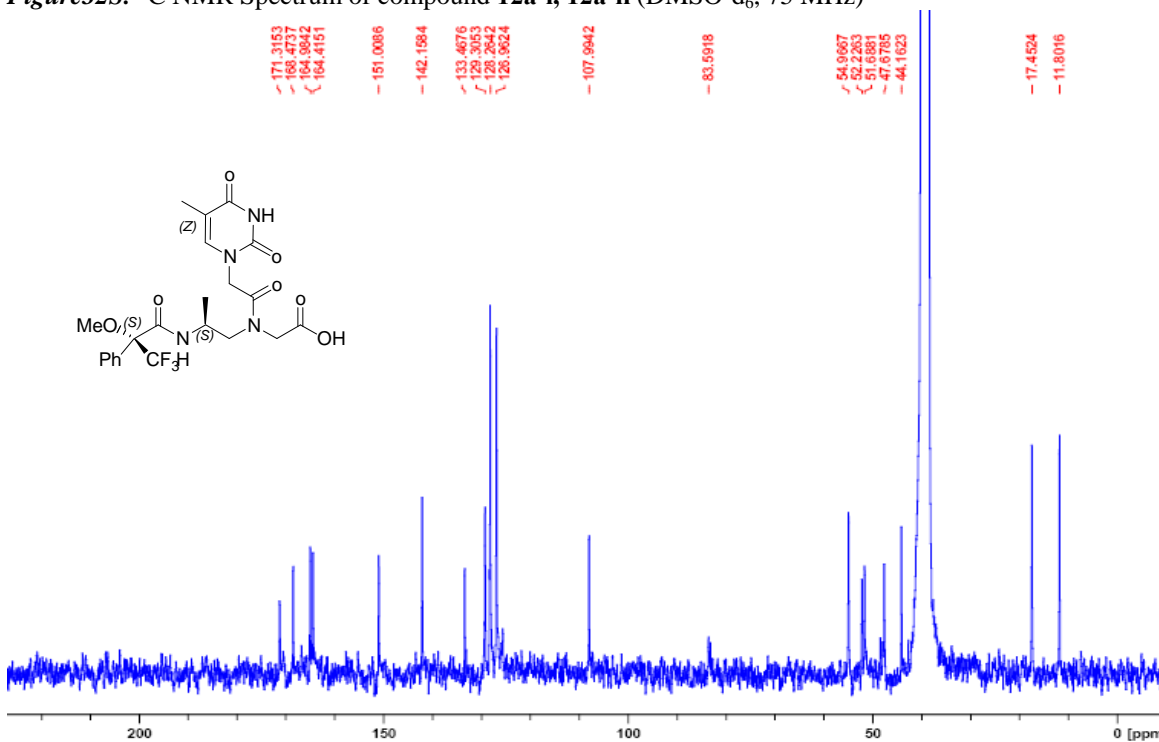

Figure33S.MALDI-TOF Spectrum of oligomer, PNA2a

Voyager Spec #1[BP = 2919.6, 5978]

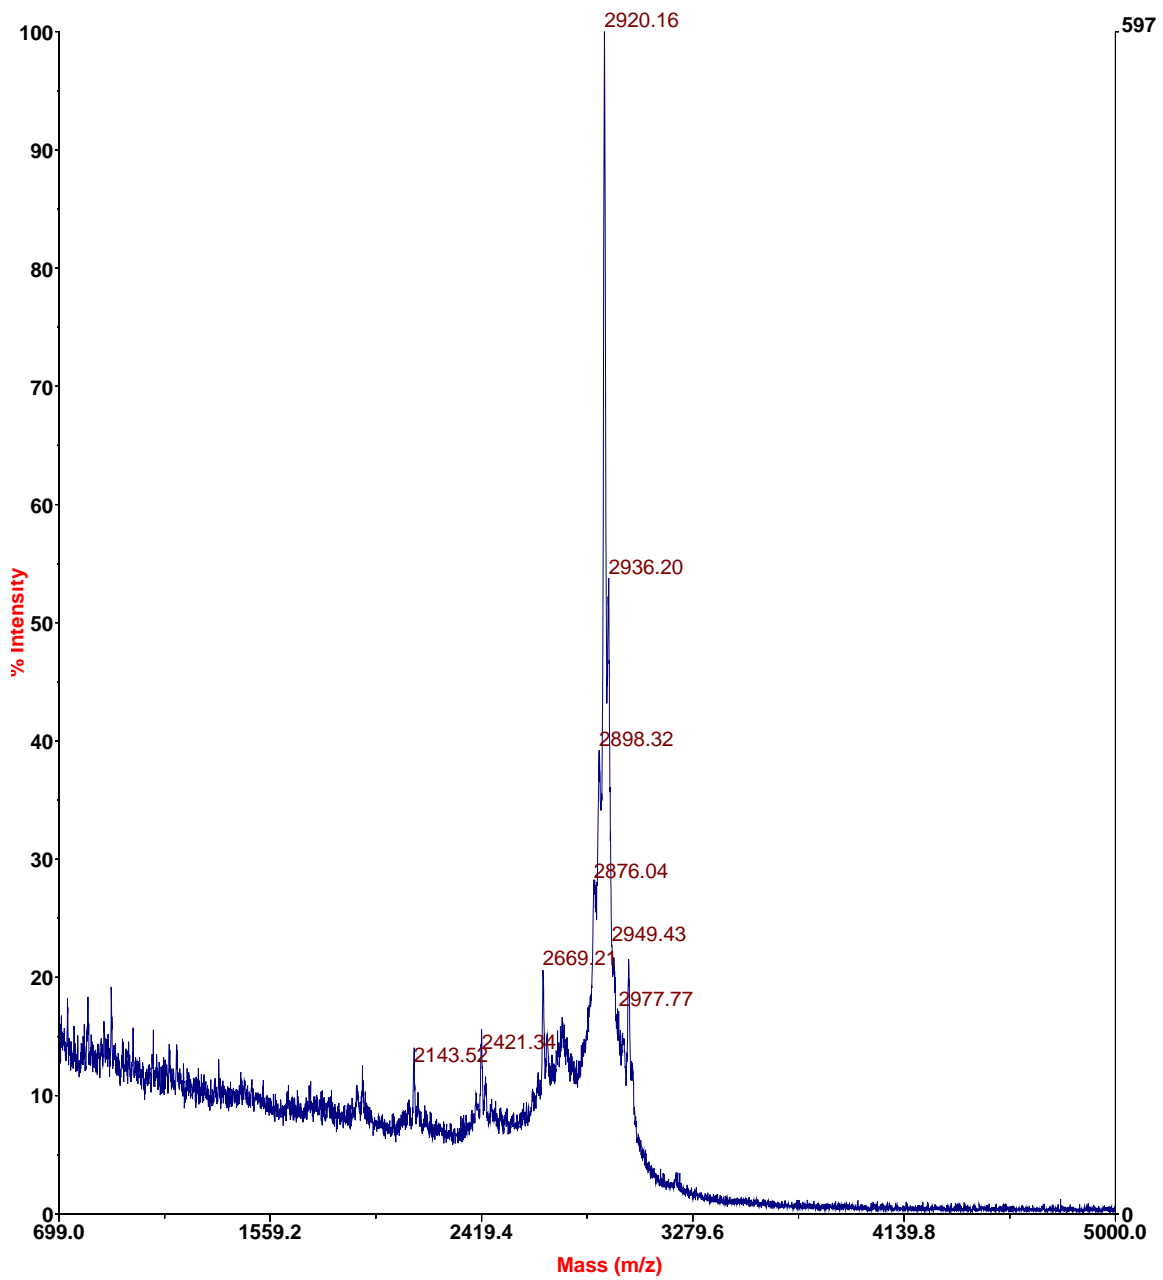

Figure 34S. MALDI-TOF Spectrum of oligomer, PNA2b

Voyager Spec #1 [BP = 2901.7, 3108]

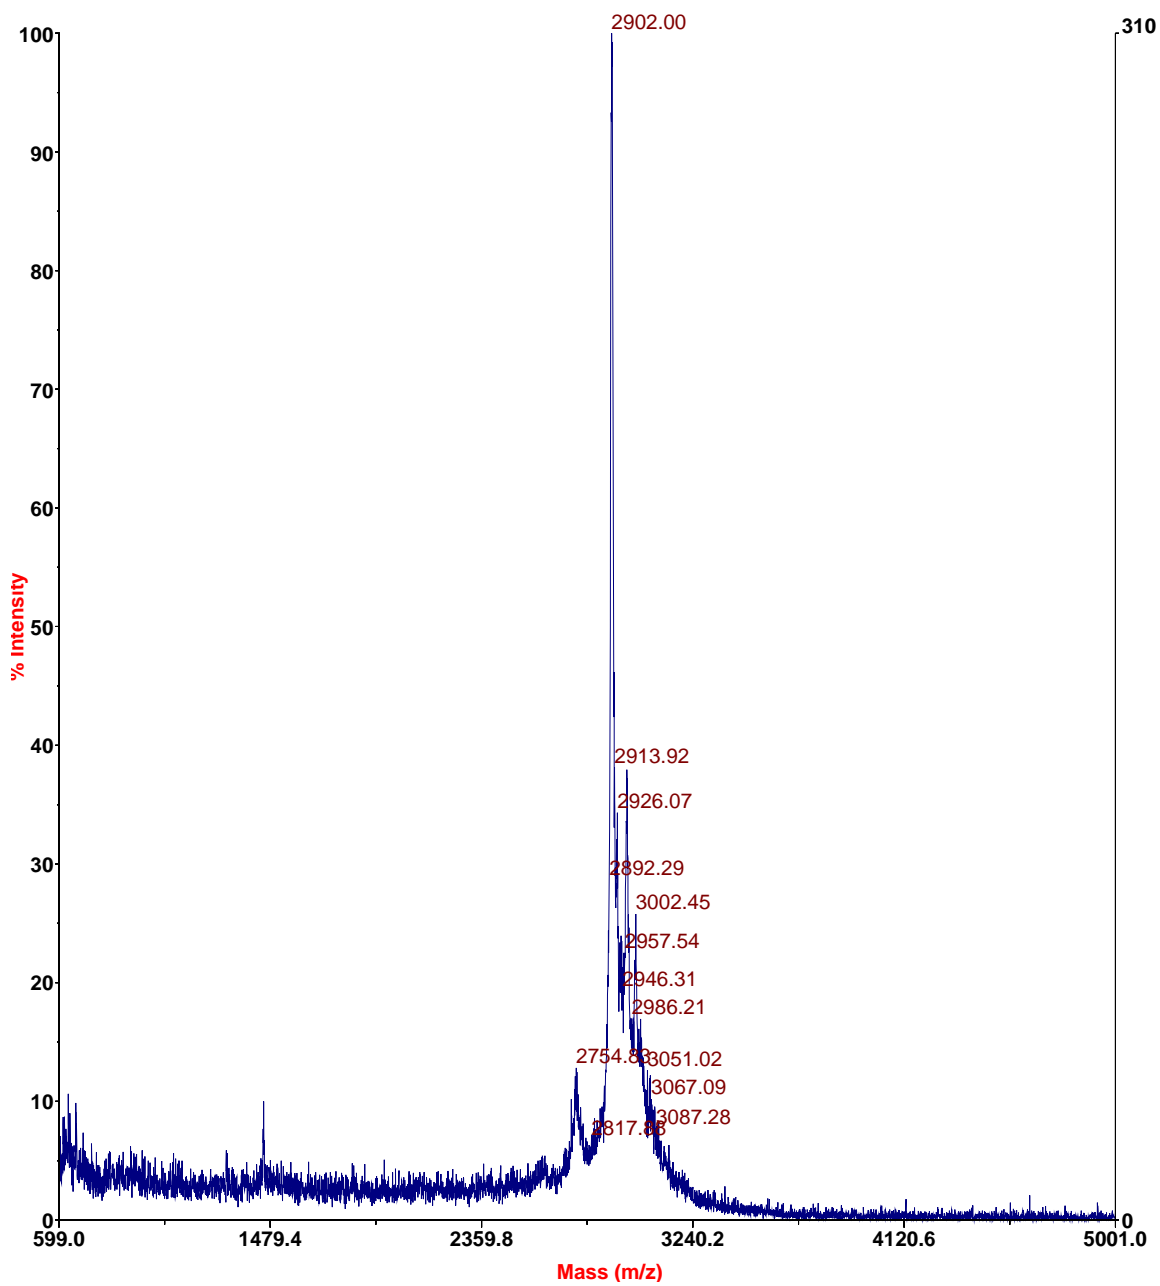

Figure35S.MALDI-TOF Spectrum of oligomer, PNA3a

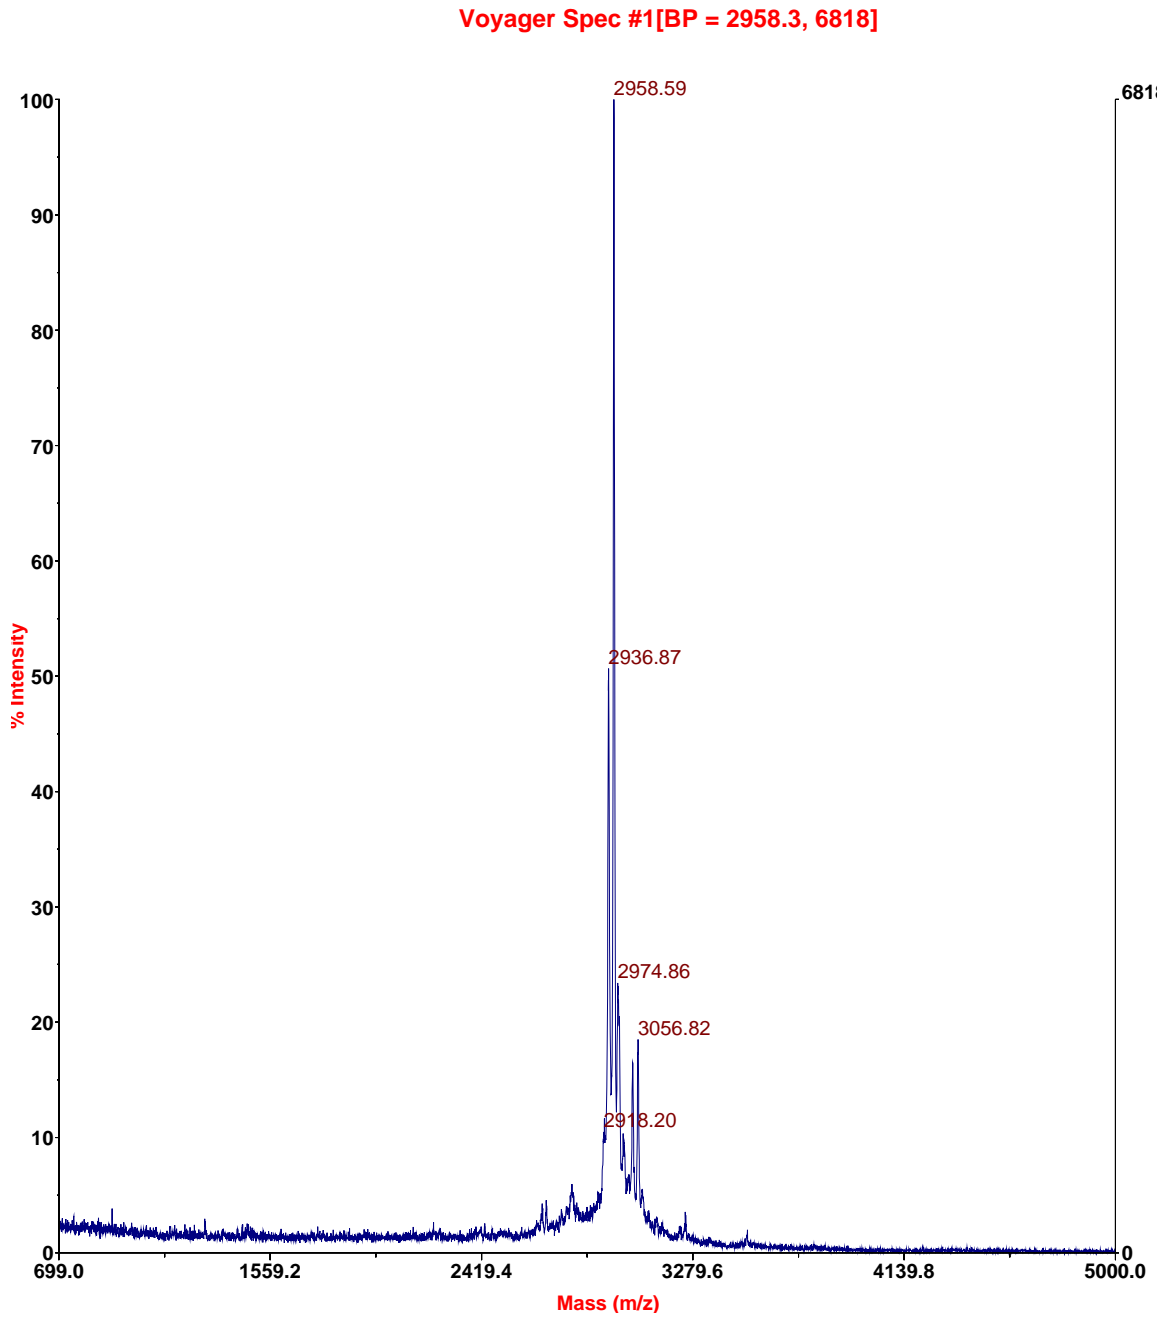

Figure36S.MALDI-TOF Spectrum of oligomer, PNA3b

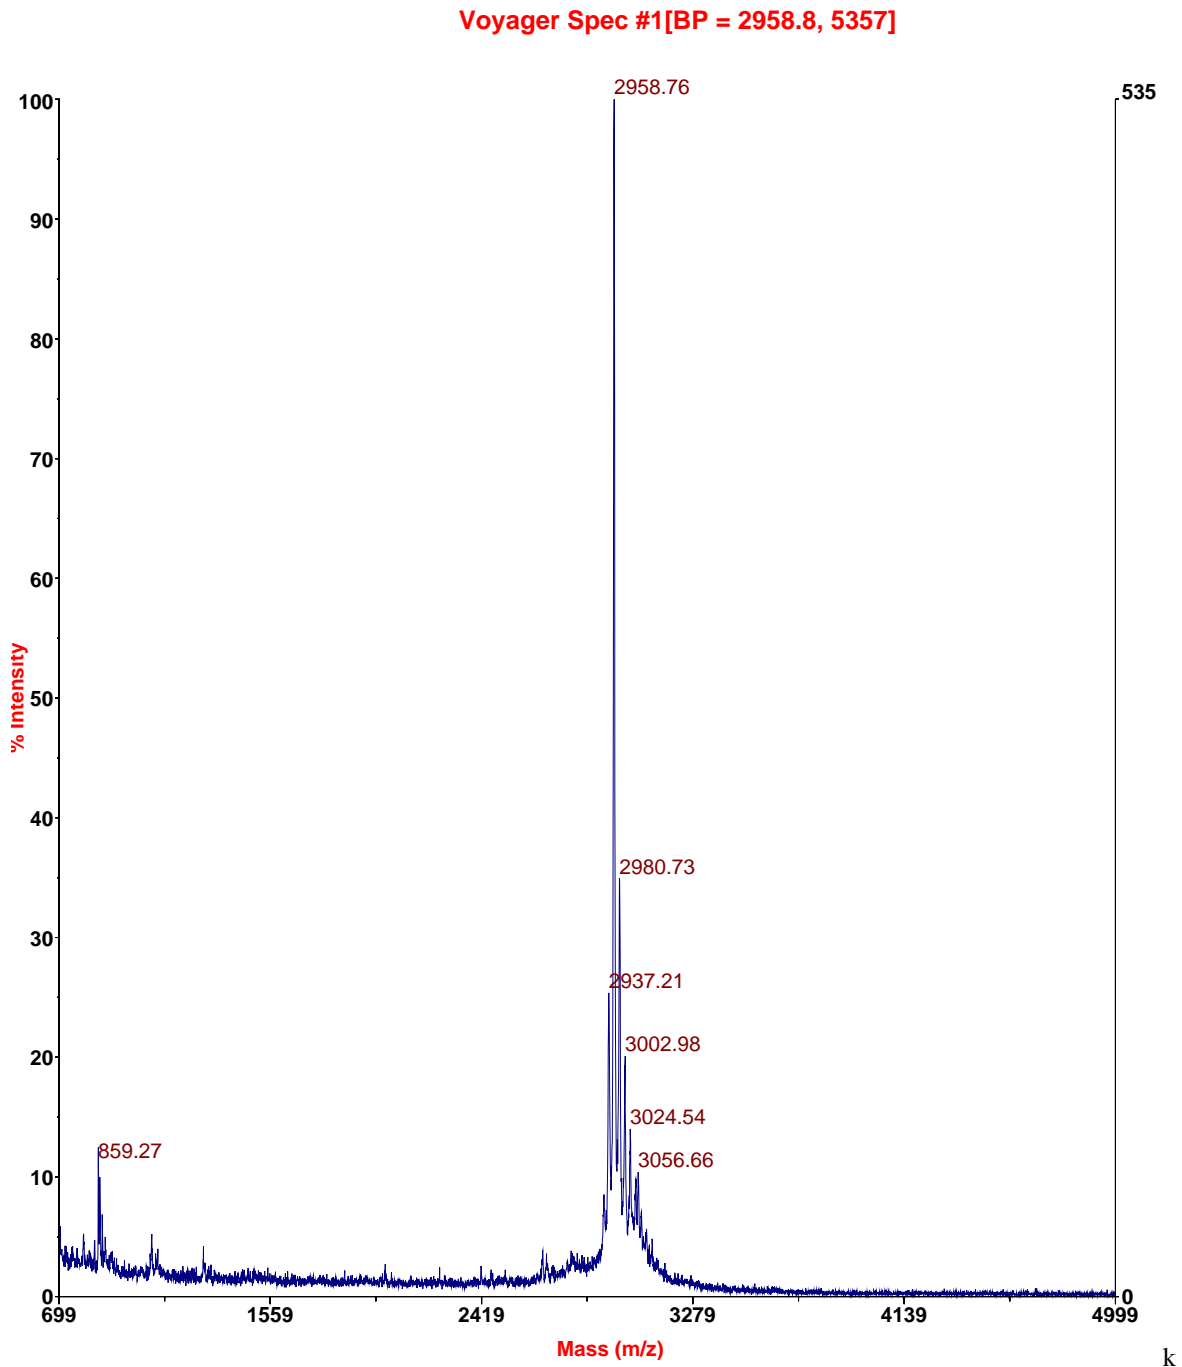

**Figure 37S.**  $^1\text{H}$  NMR Spectrum of compound **14a-i** ( $\text{CDCl}_3$ , 300 MHz)

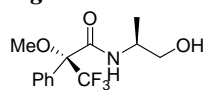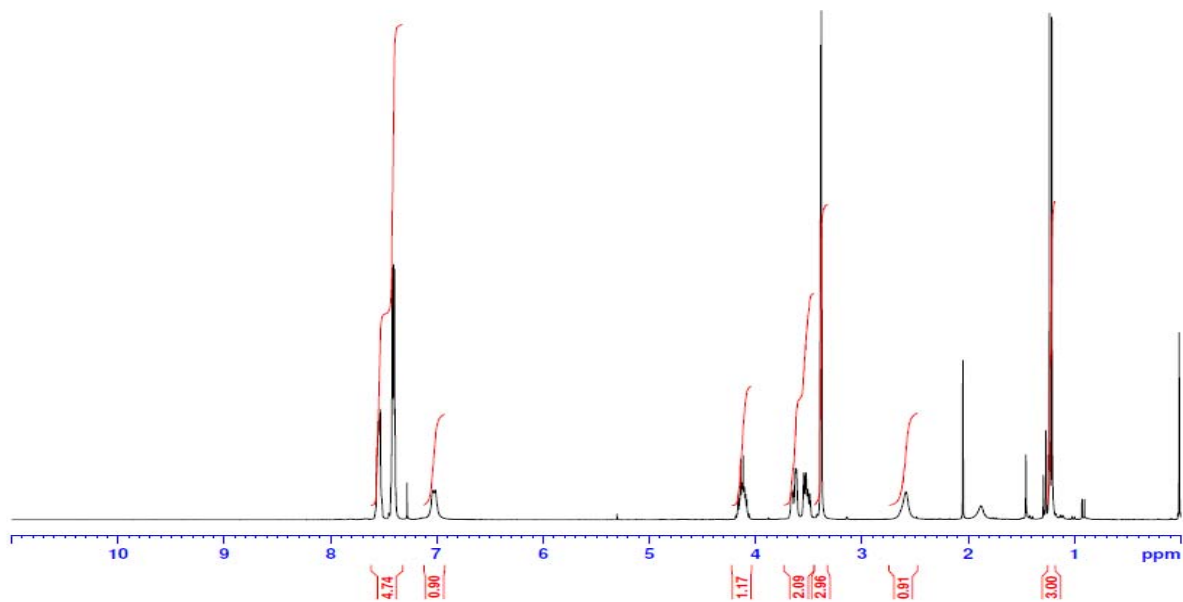

**Figure 38S.**  $^{13}\text{C}$  NMR Spectrum of compound **14a-i** ( $\text{CDCl}_3$ , 75 MHz)

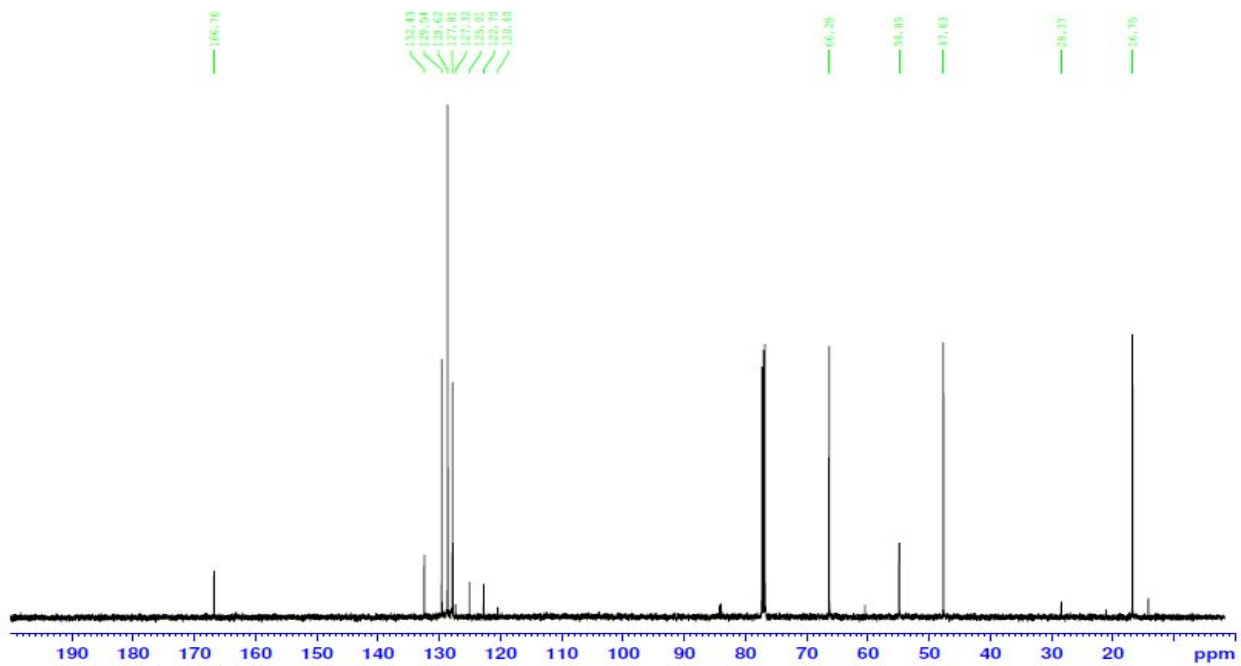

Supplement: NIHMS684170-supplement.pdf [file NIHMS684170-supplement.pdf]
